# Supplementary material for: Global burden of Clostridium difficile infections: a systematic review and meta-analysis
Source: PubMed Central journal article supplement (PMC6304170; doi:10.7189/jogh.09.010407), 2019-06

## Supplementary Material: Balsells et al. Global burden of Clostridium difficile infections: a systematic review and meta-analysis

Supplementary Table 1. Search strategies by database

| <b>Medline In-Process &amp; Other Non-Indexed Citations and Ovid MEDLINE(R) 1946 to Present</b> |                                                                                                                                    |
|-------------------------------------------------------------------------------------------------|------------------------------------------------------------------------------------------------------------------------------------|
| 1                                                                                               | exp Clostridium difficile/                                                                                                         |
| 2                                                                                               | exp Enterocolitis, Pseudomembranous/                                                                                               |
| 3                                                                                               | ("difficile" and (infection or colitis or diarrh?ea)).mp.                                                                          |
| 4                                                                                               | 1 or 2 or 3                                                                                                                        |
| 5                                                                                               | incidence.mp. or exp Incidence/ or incidence studies/                                                                              |
| 6                                                                                               | epidemiology.mp. or exp Epidemiology/                                                                                              |
| 7                                                                                               | burden.mp.                                                                                                                         |
| 8                                                                                               | 5 or 6 or 7                                                                                                                        |
| 9                                                                                               | 4 and 8                                                                                                                            |
| 10                                                                                              | limit 9 to (humans and yr="2005 -Current")                                                                                         |
| <b>Embase (Ovid)</b>                                                                            |                                                                                                                                    |
| 1                                                                                               | exp Peptoclostridium difficile/                                                                                                    |
| 2                                                                                               | exp Clostridium difficile infection/                                                                                               |
| 3                                                                                               | exp pseudomembranous colitis/                                                                                                      |
| 4                                                                                               | ("difficile" and (infection or colitis or diarrh?ea)).mp.                                                                          |
| 5                                                                                               | 1 or 2 or 3 or 4                                                                                                                   |
| 6                                                                                               | exp incidence/ or incidence.mp.                                                                                                    |
| 7                                                                                               | epidemiology/ or epidemiology.mp.                                                                                                  |
| 8                                                                                               | burden.mp.                                                                                                                         |
| 9                                                                                               | 6 or 7 or 8                                                                                                                        |
| 10                                                                                              | 5 and 9                                                                                                                            |
| 11                                                                                              | Limit 10 to (human and yr="2005 -Current")                                                                                         |
| <b>Global Health (Ovid)</b>                                                                     |                                                                                                                                    |
| 1                                                                                               | clostridium difficile.mp. or exp Clostridium difficile/                                                                            |
| 2                                                                                               | pseudomembranous colitis.mp.                                                                                                       |
| 3                                                                                               | "clostridium difficile infection".mp.                                                                                              |
| 4                                                                                               | 1 or 2 or 3                                                                                                                        |
| 5                                                                                               | incidence.mp. or exp incidence/                                                                                                    |
| 6                                                                                               | exp epidemiology/ or epidemiology.mp.                                                                                              |
| 7                                                                                               | burden.mp.                                                                                                                         |
| 8                                                                                               | 5 or 6 or 7                                                                                                                        |
| 9                                                                                               | 4 and 8                                                                                                                            |
| 10                                                                                              | Limit 9 to yr="2005-Current"                                                                                                       |
| <b>CINAHL Plus</b>                                                                              |                                                                                                                                    |
| S1                                                                                              | (MH "Clostridium Difficile") OR "clostridium difficile" OR (MH "Clostridium Infections") OR (MH "Enterocolitis, Pseudomembranous") |
| S2                                                                                              | (MH "Incidence") OR "incidence"                                                                                                    |
| S3                                                                                              | (MH "Epidemiology+") OR "epidemiology"                                                                                             |
| S4                                                                                              | "burden"                                                                                                                           |
| S5                                                                                              | S2 OR S3 OR S4                                                                                                                     |
| S6                                                                                              | S1 AND S5                                                                                                                          |
| S7                                                                                              | Limiters: Publication Year: 2005-2016                                                                                              |
| <b>Global Health Library WPRIM, IMSEAR, EMEMR and LILACS</b>                                    |                                                                                                                                    |
| (clostridium difficile) AND (burden or epidemiology or incidence)                               |                                                                                                                                    |
| <b>Web of Science:</b>                                                                          |                                                                                                                                    |
| TI=(clostridium difficile) AND TS=(incidence or prevalence or epidemiology or burden)           |                                                                                                                                    |

### Grey literature

To identify unpublished sources, a targeted-internet search was conducted for a review on CDI infection control and prevention guidelines (Balsells E, et al. J Glob Health. 2016 Dec;6(2):020410). Briefly, two reviewers conducted an internet search (with the Google search engine) of publically available national or organisational guidelines, related to CDI control (published between 2000 and 2015 and for any healthcare setting). We also accessed individual national departments/ministries of health and the websites globally of professional societies including those members of the International Federation of Infection Control. When national surveillance reports were identified in websites, these were included in this study if they met inclusion criteria.

**Supplementary Table 2. HCF-CDI incidence density and number of cases per admissions (all ages and adults)**

| Region | Reference              | Country     | Study yrs (if <1 year: mo/wk) | Age (years) | CDI ascertainment | Laboratory confirmation     | HCF-CDI Incidence Rate (95% Confidence Interval) |       |                     |                  |
|--------|------------------------|-------------|-------------------------------|-------------|-------------------|-----------------------------|--------------------------------------------------|-------|---------------------|------------------|
|        |                        |             |                               |             |                   |                             | Parameters                                       | Cases | 10,000 patient-days | 1,000 admissions |
| EM     | Al-Tawfiq (2010)       | S. Arabia   | 2007-08                       | All ages    | Lab+symp          | ELISA Tox A&B               | All CDI IP cases                                 | 42    | 2.04 (1.51-2.76)    |                  |
| EU     | Starzengruber (2014)   | Austria     | 2012                          | No details  | Lab+symp          | GDH EIA, PCR                | All CDI IP cases                                 | 278   | 5.23 (4.65-5.88)    |                  |
| EU     | Ahmetagic (2013)       | Bosnia      | 2009-12                       | ≥ 2         | Lab+symp          | Tox A/B (ELISA)             | >48 hours/IP<4 wks                               | 347   | 2.23 (1.97-2.52)    | 1.57 (1.39-1.77) |
| EU     | Ivanova (2011)         | Bulgaria    | 2008-10                       | > 2         | Lab+symp (i)      | EIA ToxA&B, Cul             | All CDI IP cases                                 | 15    | 0.34 (0.20-0.56)    |                  |
| EU     | Novak (2014)           | Croatia     | 2010-11                       | All ages    | Lab+symp (i)      | EIA A&B                     | IP<4 wks                                         | 36    | 0.42 (0.30-0.58)    | 0.34 (0.25-0.47) |
| EU     | Kanerva (2013)         | Finland     | 2008-10                       | ≥0          | Lab+symp (IP)     | Tox A/B, Cul, PCR           | Nosocomial                                       | 1976  | 2.83 (2.71-2.96)    |                  |
| EU     | Barbut (2007)          | France      | 2000-04                       | All ages    | Lab+symp          | Cyt, Cul, EIA, PCR          | All CDI IP cases                                 | 151   | 1.40 (1.19-1.64)    | 0.87 (0.72-1.04) |
| EU     | Eckert (2013)          | France      | 2009 (6m)                     | No details  | V-Survey Lab+symp | EIA Tox, Cyt, PCR, Cul, GDH | >48 hours/IP<4 wks                               | 763   | 1.33 (1.24-1.43)    | 0.64 (0.59-0.68) |
| EU     | Gastmeier (2009)       | Germany     | 2007                          | No details  | Surveillance      | Tox, Cul                    | >48 hours/IP<4 wks                               | 2213  | 4.82 (4.62-5.04)    | 3.39 (3.25-3.53) |
| EU     | KISS (2015)            | Germany     | 2008-14                       | All ages    | Surveillance      | No details                  | >3 days/IP<4wks                                  | 57974 | 4.23 (4.19-4.26)    |                  |
| EU     | Mattner (2008)         | Germany     | 2006                          | No details  | Lab               | ELISA                       | All IP cases                                     | 400   | 10.8 (133.76-11.91) |                  |
| EU     | Meyer (2012)           | Germany     | 2010                          | All ages    | Surveillance      | Tox, Cul                    | >48 hours/IP<4 wks                               | 5183  | 4.65 (4.53-4.78)    | 3.37 (3.28-3.47) |
| EU     | HPSC (2013)            | Ireland     | 2013                          | ≥2          | Lab+symp (i)      | GDH, Tox A&B, PCR           | >48 hours/IP<4 wks                               | 4759  | 2.48 (2.41-2.55)    |                  |
| EU     | Hensgens (2013)        | Netherlands | 2006-09                       | All ages    | Lab+symp (i)      | ELISA Tox A&B, Cyt          | >48 hours/IP<12w                                 | 1175  | 1.81 (1.71-1.91)    | 1.14 (1.00-1.12) |
| EU     | Kooi [01] (2008)       | Netherlands | 2004-05                       | No details  | Lab only          | Tox                         | All CDI IP cases                                 | 34    | 3.28 (2.34-4.59)    |                  |
| EU     | Kooi [02] (2008)       | Netherlands | 2004-05                       | No details  | Lab only          | Tox                         | All CDI IP cases                                 | 58    | 2.98 (2.3-3.86)     |                  |
| EU     | Kooi [03] (2008)       | Netherlands | 2004-05                       | No details  | Lab only          | Tox                         | All CDI IP cases                                 | 136   | 4.85 (4.1-5.74)     |                  |
| EU     | Kooi [04] (2008)       | Netherlands | 2004-05                       | No details  | Lab only          | Tox                         | All CDI IP cases                                 | 50    | 3.96 (3-5.22)       |                  |
| EU     | Kooi [05] (2008)       | Netherlands | 2004-05                       | No details  | Lab only          | Tox                         | All CDI IP cases                                 | 83    | 6.01 (4.85-7.45)    |                  |
| EU     | Kooi [06] (2008)       | Netherlands | 2004-05                       | No details  | Lab only          | Tox                         | All CDI IP cases                                 | 29    | 2.66 (1.85-3.83)    |                  |
| EU     | Kooi [07] (2008)       | Netherlands | 2004-05                       | No details  | Lab only          | Tox                         | All CDI IP cases                                 | 24    | 1.25 (0.84-1.87)    |                  |
| EU     | Kooi [08] (2008)       | Netherlands | 2004-05                       | No details  | Lab only          | Tox                         | All CDI IP cases                                 | 21    | 0.66 (0.43-1.01)    |                  |
| EU     | Kooi [09] (2008)       | Netherlands | 2004-05                       | No details  | Lab only          | Tox                         | All CDI IP cases                                 | 65    | 1.6 (1.26-2.04)     |                  |
| EU     | Kooi [10] (2008)       | Netherlands | 2004-05                       | No details  | Lab only          | Tox                         | All CDI IP cases                                 | 94    | 4.72 (3.86-5.78)    |                  |
| EU     | Kooi [11] (2008)       | Netherlands | 2004-05                       | No details  | Lab only          | Tox                         | All CDI IP cases                                 | 34    | 1.65 (1.18-2.31)    |                  |
| EU     | Kooi [12] (2008)       | Netherlands | 2004-05                       | No details  | Lab only          | Tox                         | All CDI IP cases                                 | 30    | 1.96 (1.37-2.8)     |                  |
| EU     | Kooi [13] (2008)       | Netherlands | 2004-05                       | No details  | Lab only          | Tox                         | All CDI IP cases                                 | 109   | 5.87 (4.86-7.09)    |                  |
| EU     | Kooi [14] (2008)       | Netherlands | 2004-05                       | No details  | Lab only          | Tox                         | All CDI IP cases                                 | 15    | 1.7 (1.03-2.82)     |                  |
| EU     | Kooi [15] (2008)       | Netherlands | 2004-05                       | No details  | Lab only          | Tox                         | All CDI IP cases                                 | 20    | 1.74 (1.12-2.7)     |                  |
| EU     | Kooi [16] (2008)       | Netherlands | 2004-05                       | No details  | Lab only          | Tox                         | All CDI IP cases                                 | 1     | 0.11 (0.02-0.78)    |                  |
| EU     | Kooi [17] (2008)       | Netherlands | 2004-05                       | No details  | Lab only          | Tox                         | All CDI IP cases                                 | 33    | 1.92 (1.37-2.7)     |                  |
| EU     | Kooi [18] (2008)       | Netherlands | 2004-05                       | No details  | Lab only          | Tox                         | All CDI IP cases                                 | 65    | 3.66 (2.87-4.67)    |                  |
| EU     | Kooi [19] (2008)       | Netherlands | 2004-05                       | No details  | Lab only          | Tox                         | All CDI IP cases                                 | 9     | 1 (0.52-1.92)       |                  |
| EU     | Kooi [20] (2008)       | Netherlands | 2004-05                       | No details  | Lab only          | Tox                         | All CDI IP cases                                 | 60    | 2.07 (1.61-2.67)    |                  |
| EU     | Kooi [21] (2008)       | Netherlands | 2004-05                       | No details  | Lab only          | Tox                         | All CDI IP cases                                 | 44    | 8.26 (6.15-11.1)    |                  |
| EU     | Kooi [22] (2008)       | Netherlands | 2004-05                       | No details  | Lab only          | Tox                         | All CDI IP cases                                 | 16    | 0.52 (0.32-0.85)    |                  |
| EU     | Kooi [23] (2008)       | Netherlands | 2004-05                       | No details  | Lab only          | Tox                         | All CDI IP cases                                 | 30    | 1.39 (0.97-1.99)    |                  |
| EU     | Kooi [24] (2008)       | Netherlands | 2004-05                       | No details  | Lab only          | Tox                         | All CDI IP cases                                 | 44    | 1.77 (1.32-2.38)    |                  |
| EU     | Paltansing [01] (2007) | Netherlands | 2005                          | All ages    | Lab+symp (i)      | Tox A&B EIA                 | All CDI IP cases                                 | 11    | 6 (3.32-10.84)      |                  |
| EU     | Paltansing [02] (2007) | Netherlands | 2005                          | All ages    | Lab+symp (i)      | Tox A&B EIA                 | All CDI IP cases                                 | 13    | 4 (2.32-6.89)       |                  |
| EU     | Paltansing [03] (2007) | Netherlands | 2005                          | All ages    | Lab+symp (i)      | Tox A&B Cyt                 | All CDI IP cases                                 | 3     | 2 (0.65-6.2)        |                  |
| EU     | Paltansing [04] (2007) | Netherlands | 2005                          | All ages    | Lab+symp (i)      | Tox A&B Cyt                 | All CDI IP cases                                 | 6     | 3 (1.35-6.68)       |                  |
| EU     | Paltansing [05] (2007) | Netherlands | 2005                          | All ages    | Lab+symp (i)      | Tox A&B EIA                 | All CDI IP cases                                 | 4     | 2 (0.75-5.33)       |                  |
| EU     | Paltansing [06] (2007) | Netherlands | 2005                          | All ages    | Lab+symp (i)      | Tox A&B Cyt                 | All CDI IP cases                                 | 7     | 3 (1.43-6.29)       |                  |
| EU     | Paltansing [07] (2007) | Netherlands | 2005                          | All ages    | Lab+symp (i)      | Tox A&B Cyt                 | All CDI IP cases                                 | 3     | 2 (0.65-6.2)        |                  |

| Region | Reference              | Country             | Study yrs (if <1 year: mo/wk) | Age (years) | CDI ascertainment | Laboratory confirmation           | HCF-CDI Incidence Rate (95% Confidence Interval) |        |                     |                                      |
|--------|------------------------|---------------------|-------------------------------|-------------|-------------------|-----------------------------------|--------------------------------------------------|--------|---------------------|--------------------------------------|
|        |                        |                     |                               |             |                   |                                   | Parameters                                       | Cases  | 10,000 patient-days | 1,000 admissions                     |
| EU     | Paltansing [8] (2007)  | Netherlands         | 2005                          | All ages    | Lab+symp (i)      | Tox A&B EIA                       | All cases IP                                     | 1      | <1                  |                                      |
| EU     | Paltansing [9] (2007)  | Netherlands         | 2005                          | All ages    | Lab+symp (i)      | Tox A&B EIA + Cyt                 | All cases IP                                     | 4      | <1                  |                                      |
| EU     | Paltansing [10] (2007) | Netherlands         | 2005                          | All ages    | Lab+symp (i)      | Tox A&B Cyt                       | All cases IP                                     | 6      | 2 (0.9-4.45)        |                                      |
| EU     | Paltansing [11] (2007) | Netherlands         | 2005                          | All ages    | Lab+symp (i)      | Tox A&B Cyt                       | All cases IP                                     | 4      | 2 (0.75-5.33)       |                                      |
| EU     | Paltansing [12] (2007) | Netherlands         | 2005                          | All ages    | Lab+symp (i)      | Tox A&B Cyt                       | All cases IP                                     | 1      | 1 (0.14-7.1)        |                                      |
| EU     | Paltansing [13] (2007) | Netherlands         | 2005                          | All ages    | Lab+symp (i)      | Tox A&B EIA                       | All cases IP                                     | 4      | 2 (0.75-5.33)       |                                      |
| EU     | RIVM                   | Netherlands         | 2012-14                       | ≥2          | S-Surv (IP)       | EIA, EIA+GDH, LAMP, PCR           | All cases IP                                     | 2412   | 2.93 (2.81-3.05)    | 1.55 (1.47-1.63)<br>N: 1480(2012-13) |
| EU     | Pituch (2015) [1]      | Poland              | 2011-13                       | ≥2          | Lab+symp          | EIA TOX A/B, TCa                  | All cases IP                                     | 55     | 3 (4.44-3.91)       |                                      |
| EU     | Pituch (2015) [2]      | Poland              | 2011-13                       | ≥2          | Lab+symp          | GDH+TOX A/B                       | All cases IP                                     | 263    | 14.1 (100.34-15.91) |                                      |
| EU     | Pituch (2015) [3]      | Poland              | 2011-13                       | ≥2          | Lab+symp          | EIA TOX A/B                       | All cases IP                                     | 190    | 9.63 (0.33-11.11)   |                                      |
| EU     | Pituch (2015) [4]      | Poland              | 2011-13                       | ≥2          | Lab+symp          | EIA GDH and EIA TOX A/B; TC, PCRa | All cases IP                                     | 193    | 5 (0.27-5.76)       |                                      |
| EU     | Pituch (2015) [5]      | Poland              | 2011-13                       | ≥2          | Lab+symp          | GDH+TOX A/B                       | All cases IP                                     | 133    | 3.37 (0.3-3.99)     |                                      |
| EU     | Pituch (2015) [6]      | Poland              | 2011-13                       | ≥2          | Lab+symp          | GDH+TOX A/B                       | All cases IP                                     | 95     | 2.37 (0.25-2.89)    |                                      |
| EU     | Pituch (2015) [7]      | Poland              | 2011-13                       | ≥2          | Lab+symp          | GDH+TOX A/B, TCa                  | All cases IP                                     | 190    | 2.83 (0.06-3.27)    |                                      |
| EU     | Pituch (2015) [8]      | Poland              | 2011-13                       | ≥2          | Lab+symp          | EIA TOX A/B, TCa                  | All cases IP                                     | 868    | 19.13 (0.39-20.45)  |                                      |
| EU     | Pituch (2015) [9]      | Poland              | 2011-13                       | ≥2          | Lab+symp          | EIA GDH and EIA TOX A/B, TCa      | All cases IP                                     | 192    | 3 (7.71-3.46)       |                                      |
| EU     | Pituch (2015) [10]     | Poland              | 2011-13                       | ≥2          | Lab+symp          | GDH+TOX A/B                       | All cases IP                                     | 519    | 7.2 (2.69-7.85)     |                                      |
| EU     | Pituch (2015) [11]     | Poland              | 2011-13                       | ≥2          | Lab+symp          | GDH+TOX A/B, TCa                  | All cases IP                                     | 297    | 19.97 (1.31-22.36)  |                                      |
| EU     | Pituch (2015) [12]     | Poland              | 2011-13                       | ≥2          | Lab+symp          | EIA TOXA/B or qPCR; TCa           | All cases IP                                     | 1407   | 16.13 (4.41-17.01)  |                                      |
| EU     | Pituch (2015) [13]     | Poland              | 2011-13                       | ≥2          | Lab+symp          | GDH+TOX A/B, Illuminigena         | All cases IP                                     | 703    | 6.47 (13.71-6.97)   |                                      |
| EU     | Reigadas (2015)        | Spain               | 2013                          | ≥2          | Lab+symp          | Tox A/B Cul PCR                   | >48 hours/IP<4 wks                               | 152    | 8 (2.15-9.38)       |                                      |
| EU     | Rodriguez-Pardo (2013) | Spain               | 2009                          | All ages    | Lab+symp          | Tox A&B, Cul                      | All cases IP                                     | 365    | 1.93 (1.74-2.14)    |                                      |
| EU     | Siller-Ruiz (2014)     | Spain               | 2011-12                       | ≥2          | Lab+symp (i)      | Tox A&B, Cul, Cyt                 | >48 hours/IP<4 wks                               | 41     | 1.15 (0.85-1.56)    |                                      |
| EU     | Folkhälsomyndigheten   | Sweden              | 2014                          | ≥2          | Surv, Lab only    | No details                        | All CDI IP cases                                 | 7691   | 11 (10.76-11.25)    |                                      |
| EU     | Fenner (2008)          | Switzerland         | 2006-07                       | All ages    | Lab only (i)      | EIA ToxA/B                        | All CDI IP cases                                 | 78     | 2.3 (1.84-2.87)     |                                      |
| EU     | Kohler (2013)          | Switzerland         | 2009-10                       | No details  | Same facility     | Cyt                               | >48 hours/IP<4 wks                               | 108    | 2.3 (1.90-2.77)     |                                      |
| EU     | PHE (M-Surv)           | UK England          | 2006-14                       | ≥2          | Lab+symp          | No details                        | All cases IP                                     | 199146 | 6.98 (6.95-7.01)    |                                      |
| EU     | Aldeyab (2009)         | UK Northern Ireland | 2002-07                       | ≥2          | Lab+symp          | Tox A&B                           | All cases IP                                     | 393    | 6.00 (5.44-6.62)    |                                      |
| EU     | HSC (2011-15)          | UK Northern Ireland | 2011-15                       | ≥2          | Lab+symp          | Tox A&B                           | All cases IP                                     | 2477   | 2.65 (2.55-2.76)    |                                      |
| EU     | Jen (2012)             | UK-England          | 1997-10                       | ≥2          | ICD10             |                                   | IP+≥72LOS                                        | 205037 | 3.53 (6.64-3.54)    | 2.3 (2.29-2.31)                      |
| EU     | Reddy (2010)           | UK-Scotland         | 2003-07                       | All ages    | Lab               |                                   | All IP new cases                                 | 4922   | 1.69 (2.32-1.74)    |                                      |
| LA     | Ministry of Health     | Uruguay             | 2012                          | ≥2          | S-Surv, Lab only  | No details                        | IP<4 wkssk                                       | 153    | 3.0 (2.56-3.52)     |                                      |
| NA     | Lambert (2009)         | Canada              | 2005-06                       | All ages    | Lab+symp          | EIA GDH, Tox A, Cyt               | >48 hours/IP<4 wks                               | 646    | 9.11 (8.44-9.84)    |                                      |
| NA     | Longtin (2013)         | Canada              | 2010-11                       | All ages    | Lab+symp          | PCR, EIA/Cyt                      | >72 hours/IP<4 wks                               | 85     | 8.88 (1.55-10.98)   |                                      |
| NA     | PHA (2014)             | Canada              | 2007-12                       | ≥1          | Lab+symp          | ToxA/B, Cul                       | >72 hours/IP<4 wks                               | 18871  | 6.46 (6.36-6.55)    | 4.88 (4.81-4.95)                     |
| NA     | Benoit (2011)          | US                  | 2007-08                       | All ages    | Lab only          | EIA                               | >72 hours/IP 30 days                             | 2904   | 10.5 (10.2-10.9)    |                                      |
| NA     | Catanzaro (2012)       | USA                 | 2009-10                       | No details  | Lab only          | EIA, Cyt, GDH, Cul                | All CDI IP cases                                 | 57     | 11.94 (9.21-15.47)  |                                      |
| NA     | Cloud (2009)           | US                  | 2004-06                       | No details  | Lab+symp          | Cul, PCR                          | Nosocomial                                       | 272    | 8.66 (7.69-9.75)    |                                      |
| NA     | Kanamori (2015)        | US                  | 2003-12                       | No details  | Lab               | No details                        | All CDI IP cases                                 | 887    | 3.97 (3.72-4.24)    |                                      |

| Region        | Reference             | Country       | Study yrs (if <1 year: mo/wk) | Age (years) | CDI ascertainment | Laboratory confirmation     | HCF-CDI Incidence Rate (95% Confidence Interval) |        |                     |                  |
|---------------|-----------------------|---------------|-------------------------------|-------------|-------------------|-----------------------------|--------------------------------------------------|--------|---------------------|------------------|
|               |                       |               |                               |             |                   |                             | Parameters                                       | Cases  | 10,000 patient-days | 1,000 admissions |
| NA            | Kang (2014)           | US            | 2005-11                       |             |                   |                             |                                                  | 685    | 4.33 (7.16-4.67)    |                  |
| NA            | Khanna (2012)         | US            | 1991-05                       | All ages    | ICD9+Chart review | ICD9 (I/OP)+Chart (Cyt,EIA) | >48 hours/IP<4 wks                               | 192    | 1.66 (1.44-1.91)    |                  |
| NA            | King (2011)           | US            | 2009                          | No details  | Lab+symp          | ToxA&B                      | >48 hours/IP<4 wks                               | 89     |                     | 8.08 (6.56-9.95) |
| NA            | Montoya (2013)        | US            | 2011                          | All ages    | Lab+symp          | Tox, PCR                    | >48 hours/IP<4 wks                               | 54     | 4.5 (3.45-5.88)     |                  |
| NA            | Sohn [X] (2005)       | US            | 2000-03                       | No details  | Lab+symp          | Unknown                     | >48 hours/IP<4 wks                               | 294    | 11.33 (10.11-12.70) |                  |
| NA            | Tartof (2014)         | US            | 2011-12                       | All ages    | Lab only          | PCR                         | >48 hours/IP<4 wks                               | 2505   | 17.84 (17.16-18.55) | 9.32 (8.97-9.70) |
| WP            | Mitchell (2011)       | Australia     | 2006-10                       | ≥ 2         | Lab+symp          | EIA, Cul                    | All CDI IP cases                                 | 357    | 3.35 (3.02-3.72)    |                  |
| WP            | Slimings (2014)       | Australia     | 2011-12                       | ≥ 2         | N-Surv, Lab+symp  | Tox A/B, PCR                | >48 hours/IP<4 wks                               | 4446   | 2.95 (2.86-3.04)    |                  |
| WP            | Van Gessel (2008)     | Australia (W) | 2006                          | ≥ 2         | Lab+symp (i)      | EIA, Cyt ToxA/B, Cul        | >72 hours/ IP<4 wks                              | 46     | 1.2 (0.9-1.6)       |                  |
| WP            | Kim (2012)            | S. Korea      | 2009-10                       | No details  | Lab+symp          | PCR, Tox A&B                | >72 hours/ IP<8 wks                              | 166    | 7.16 (6.15-8.34)    | 6.49 (5.57-7.56) |
| WP            | Koh (2007)            | Singapore     | 2002-03 (5m)                  | All ages    | Lab+symp (IP)     | EIA A&B, Cul                | All CDI IP cases                                 | 88     | 5.38 (4.37-6.63)    |                  |
| <b>Adults</b> |                       |               |                               |             |                   |                             |                                                  |        |                     |                  |
| EM            | Khan (2012)           | Qatar         | 2006-09                       | ≥15         | Lab+symp          | EIA, A/B                    | 72h/IP<2 months                                  | 123    | 1.6 (1.34-1.91)     |                  |
| EU            | Wenisch (2012)        | Austria       | 2009-10                       | Adult       | Lab+symp          | ELISA ToxA&B+PCR            | >48 hours/IP<4 wks                               | 133    | 5.65 (4.77-6.70)    |                  |
| EU            | Balihar (2014)        | Czech Rep     | 2006-08                       | ≥18         | Lab+symp          | ELISA, EIA ToxA/B           | >72 hours/IP 7 days                              | 156    | 1.01 (0.86-1.18)    | 0.83 (0.71-0.97) |
| EU            | Vesteinsdottir (2012) | Iceland       | 2010-11                       | ≥18         | Lab only          | ELISA ToxA/B                | >72 hours/IP 6 wks                               | 59     |                     | 1.97 (1.53-2.54) |
| EU            | Di Bella [1] (2013)   | Italy         | 2006-11                       | ≥18         | Lab only          | EIA Tox A&B                 | All cases IP                                     | 70     | 1.44 (1.14-1.82)    |                  |
| EU            | Di Bella [2] (2013)   | Italy         | 2006-11                       | ≥18         | Lab only          | EIA Tox A&B                 | All cases IP                                     | 69     | 1.01 (0.80-1.28)    |                  |
| EU            | Di Bella [3] (2013)   | Italy         | 2006-11                       | ≥18         | Lab only          | EIA Tox A&B                 | All cases IP                                     | 77     | 0.39 (0.31-0.49)    |                  |
| EU            | Di Bella [4] (2013)   | Italy         | 2006-11                       | ≥18         | Lab only          | EIA Tox A&B                 | All cases IP                                     | 138    | 1.67 (1.41-1.97)    |                  |
| EU            | Di Bella [5] (2013)   | Italy         | 2006-11                       | ≥18         | Lab only          | EIA Tox A&B                 | All cases IP                                     | 48     | 1.62 (1.22-2.15)    |                  |
| EU            | Laza (2015)           | Romania       | 2013-14                       | ≥18         | Lab+symp          | EIA Tox A&B                 | All cases IP                                     | 219    | 17.16 (15.03-19.6)  |                  |
| EU            | Mertz (2010)          | Switzerland   | 2004-08                       | Adults      | Lab only          | EIA ToxA&B, Cul             | All cases IP                                     | 405    | 2.30 (2.09-2.54)    |                  |
| EU            | Ergen (2009)          | Turkey        | 2004-05                       | ≥18         | Lab+symp          | Tox A&B, Cul                | Nosocomial                                       | 19     | 2.60 (1.66-4.08)    | 2.10 (1.34-3.29) |
| EU            | Jen (2012)            | UK-England    | 1997-10                       | ≥20         | ICD10+≥72h LOS    | No details                  | All cases IP                                     | 203488 | 3.64 (3.63-3.66)    | 2.58 (2.57-2.59) |
| EU            | HPS (09-14)           | UK-Scotland   | 2009-14                       | ≥15         | Lab               |                             | All cases IP                                     | 14045  | 4.42 (4.34-4.49)    |                  |
| LA            | Silva (2013)          | Brazil        | 2005-09                       | >18         | Lab+symp          | EIA Tox A&B                 | >72 hours/IP<72 h                                | 205    | 3.78 (3.30-4.34)    | 1.44 (1.26-1.65) |
| NA            | Gravel (2009)         | Canada        | 2004-05 (6m)                  | ≥18         | Lab+symp          | ToxA/B, Cul                 | >72 hours/IP<2 mo                                | 1430   | 6.46 (6.14-6.81)    | 4.64 (4.41-4.89) |
| NA            | PHA (2014)            | Canada        | 2007-12                       | ≥18         | Lab+symp          | ToxA/B, Cul, PCR            | >72 hours/IP< 1 mo                               | 18291  | 6.56 (6.47-6.66)    | 5.06 (4.99-5.14) |
| NA            | Armbruster (2012)     | US            | 2005-09                       | Army staff  | Lab only          | No details                  | IP<12 wks                                        | 165    |                     | 2.34 (2.01-2.73) |
| NA            | Bengualid (2011)      | US            | 2006-08                       | ≥18         | Lab+symp          | EIA Tox A&B                 | >72 hours/IP<6 months                            | 302    | 7.93 (7.08-8.88)    |                  |
| NA            | Dubberke [A] (2010)   | US            | 2000-06                       | ≥18         | Lab only          | EIA Tox                     | >48 hours/IP<4 wks                               | 2888   | 18.12 (17.47-18.79) | 9.06 (8.73-9.39) |
| NA            | Dubberke [B] (2010)   | US            | 2000-06                       | ≥18         | Lab only          | EIA Tox                     | >48 hours/IP<4 wks                               | 414    | 11.94 (10.85-13.15) | 5.83 (5.30-6.42) |
| NA            | Dubberke [C] (2010)   | US            | 2000-06                       | ≥18         | Lab only          | EIA Tox                     | >48 hours/IP<4 wks                               | 629    | 4.52 (4.18-4.89)    | 2.48 (2.29-2.68) |
| NA            | Dubberke [D] (2010)   | US            | 2000-06                       | ≥18         | Lab only          | EIA Tox                     | >48 hours/IP<4 wks                               | 478    | 7.07 (6.46-7.73)    | 4.21 (3.85-4.60) |
| NA            | Dubberke [E] (2010)   | US            | 2000-06                       | ≥18         | Lab only          | EIA Tox                     | >48 hours/IP<4 wks                               | 700    | 5.52 (5.12-5.94)    | 4.31 (4.00-4.64) |
| NA            | Gase (2013)           | US            | 2009 (6m)                     | ≥18         | Lab+symp (Aud)    | EIA Tox A&B                 | >72 hours/IP<4 wks                               | 1891   | 10.18 (9.73-10.65)  | 5.42 (5.18-5.67) |
| NA            | Gase (2013)           | US            | 2009 (6m)                     | ≥18         | Lab only (LabID)  | EIA Tox A&B                 | >72 hours/IP<4 wks                               | 2234   | 12.03 (11.55-12.54) | 6.4 (6.14-6.67)  |
| NA            | Gutierrez (2013)      | US            | 1998-10                       | Army staff  | ICD9+Lab          | No details                  | IP<12 wks                                        | 1405   |                     | 1.30 (1.23-1.37) |
| NA            | Kutty (2008)          | US            | 2005                          | ≥18         | Lab+symp          | EIA Tox A&B                 | >48 hours/IP<4 wks                               | 516    | 10.16 (9.32-11.07)  |                  |
| NA            | Gordin (2005)         | US            | 1998-03                       | Veterans    | Lab+symp          | EIA Tox A                   | >72h/30day med hist                              | 100    | 3.77 (3.1-4.59)     |                  |
| NA            | Koo (2014)            | US            | 2010-11                       | ≥18         | Lab+symp          | PCR,ELISA, Cul              | All cases IP                                     | NR     | 13.4 (11.8-15)      |                  |
| NA            | Koo (2014)            | US            | 2010-11                       | ≥18         | Lab+symp          | PCR,ELISA, Cul              | All cases IP                                     | NR     | 27 (24.7-29.3)      |                  |
| NA            | Mah (2011)            | US            | 2007-08                       | ≥20         | Lab+symp          | EIA Tox                     | during IP/IP<30 days                             | 202    | 8.00 (6.97-9.18)    | 5.19 (4.52-5.96) |
| NA            | Manian (2013)         | US            | 2007-08                       | Adult       | Lab+symp          | EIA Tox A&B                 | >72 hours/IP 7d                                  | 322    | 8.80 (7.89-9.82)    |                  |
| NA            | McFarland (2007)      | US            | 2004                          | Veterans    | Lab+symp          | Cul, EIA Tox A/&B           | All cases                                        | 144    | 23.8 (20.21-28.02)  |                  |

| Region | Reference         | Country     | Study yrs (if <1 year: mo/wk) | Age (years) | CDI ascertainment | Laboratory confirmation | HCF-CDI Incidence Rate (95% Confidence Interval) |       |                     |                     |
|--------|-------------------|-------------|-------------------------------|-------------|-------------------|-------------------------|--------------------------------------------------|-------|---------------------|---------------------|
|        |                   |             |                               |             |                   |                         | Parameters                                       | Cases | 10,000 patient-days | 1,000 admissions    |
| NA     | Murphy (2012)     | US          | 2000-07                       | ≥18         | ICD9+History IP   | No details              | ICD9+PD<12 wks                                   | 5029  |                     | 2.84 (2.77-2.92)    |
| NA     | Nowak (2012)      | US          | 2003-06                       | Adult       | Lab only          | No details              | All cases IP                                     | 1393  | 6.3 (5.98-6.64)     |                     |
| NA     | Salgado (2009)    | US          | 2002-04                       | Adult       | Lab+symp          | EIA Tox A&B             | >72 hours/IP 30 days                             | 163   | 13.50 (11.58-15.74) |                     |
| NA     | Tartof (2014)     | US          | 2011-12                       | ≥19         | Lab               | PCR                     | All cases IP                                     | 4784  | 35.42 (34.43-36.44) |                     |
| NA     | Tartof (2015)     | US          | 2011-12                       | ≥18         | Lab               | PCR                     | All cases IP                                     | 2638  | 14.42 (13.88-14.98) |                     |
| NA     | Welker (2012)     | US          | 2006-07                       | >18         | Lab+symp          | EIA Tox A&B             | >72 hours/IP 7 days                              | 156   |                     | 6.64 (5.67-7.76)    |
| NA     | Welker (2012)     | US          | 2006-07                       | >18         | ICD9              | No details              | >72 hours/IP 7 days                              | 178   |                     | 7.57 (6.54-8.77)    |
| NA     | Young-Xu (2015)   | US          | 2009-13                       | ≥18         | ICD9+Lab+Tx       | No details              | During IP/IP<4ks                                 | 25976 |                     | 13.26 (13.11-13.42) |
| NA     | Zilberberg (2011) | US          | 2007-08                       | ≥18         | Lab               | EIA Tox                 | >48 hours/IP<4 wks                               | 6666  | 8.43 (8.23-8.64)    | 3.30 (3.22-3.38)    |
| WP     | Foster (2014)     | Australia   | 2011-12 (6m)                  | Adult       | Lab+symp          | PCR                     | All cases                                        | 331   | 7.4 (6.64-8.24)     |                     |
| WP     | Honda (2014)      | Japan       | 2010-12                       | ≥18         | Lab+symp          | EIA ToxA&B, PCR         | >72 hours/IP<4 wks                               | 116   | 3.31 (2.76-3.97)    | 3.59 (2.99-4.31)    |
| WP     | Tan (2014)        | Singapore   | 2011-12 (6m)                  | ≥21         | Lab+symp (i)      | Tox A/B, GDH & PCR      | >48 hours/IP<4 wks                               | 47    | 7.62 (5.72-10.14)   | 4.54 (3.41-6.05)    |
| WP     | Kim (2013)        | South Korea | 2004-08                       | Adults      | Lab+symp          | EIA ToxA&B, Cul         | "healthcare-associated"                          | 1890  |                     | 2.74 (2.62-2.87)    |
| WP     | Chung (2010)      | Taiwan      | 2007-08                       | ≥18         | Lab+symp          | EIA Tox A&B             | >48 hours/IP<4 wks                               | 86    | 4.26 (3.45-5.26)    | 3.40 (2.75-4.20)    |

**Notes:** LA: Latin America, NA: North America, EU: Europe, WP: Western Pacific, EM: Eastern Mediterranean, AF: Africa. (i) incident cases only (i+r): incident and recurrent cases, IP: in-patient, ICD9: 008.45, LOS: Length of stay, EIA: Enzyme Immunoassay, Tox: Toxin, &: and, /: or Cyt: Cytotoxin, GDH: glutamate dehydrogenase, Cul: Culture, PCR: polymerase chain reaction. Lab: Laboratory confirmation, Symp: symptoms confirmation, including at least one of the following diarrhoeal disease, endoscopic or histologic features.

**Supplementary Table 3. HO-HCF CDI incidence density and number of cases per admissions (all ages and adults)**

| Region        | Reference             | Country     | Study yrs<br>(if <1 year:<br>mo/wk) | Age (years) | CDI ascertainment              | Laboratory assay           | Healthcare onset-healthcare facility-CDI rates (95% Confidence Interval) |       |                         |                     |
|---------------|-----------------------|-------------|-------------------------------------|-------------|--------------------------------|----------------------------|--------------------------------------------------------------------------|-------|-------------------------|---------------------|
|               |                       |             |                                     |             |                                |                            | Parameters                                                               | Cases | 10,000 patient-<br>days | 1,000 admissions    |
| EU            | ISP-WIV               | Belgium     | 2008-14                             | All ages    | Mandatory Surveillance (IP)    | No details                 | >48 hours                                                                | 1081  | 1.01 (0.95-1.07)        | 0.86 (0.81-0.91)    |
| EU            | Novak (2014)          | Croatia     | 2010-11                             | All ages    | Lab+symp (i)                   | EIA A&B                    | facility-onset                                                           | 39    | 0.45 (0.33-0.62)        | 0.37 (0.27-0.50)    |
| EU            | SSI (2015)            | Denmark     | 2010-14                             | No details  | Lab+symp                       | No details                 | ≥48 hours                                                                | 10397 | 5.98 (5.86-6.09)        |                     |
| EU            | Fenner (2008)         | Switzerland | 2006-07                             | All ages    | Lab only (i)                   | EIA ToxA/B                 | ≥2 days                                                                  | 75    | 2.21 (1.76-2.77)        | 2.55 (2.03-3.20)    |
| LA            | Souza Dias (2010)     | Brazil      | 2002-03                             | All ages    | Lab+symp                       | EIA Tox A&B                | >48 hours                                                                |       |                         | 3.32 (2.72-4.05)    |
| NA            | Alfa (2015)           | Canada      | 2009-12                             | All wards   | Lab                            | Multistep algorithm        | Healthcare-acquired                                                      | 64    | 5.01 (3.92-6.4)         |                     |
| NA            | DiDiodato [08] (2013) | Canada      | 2008-11                             | ≥1          | MOHLTC                         | No details                 | >72 hours                                                                |       | 3.20 (2.68-3.74)        |                     |
| NA            | Faires (2014)         | Canada      | 2006-11                             | All ages    | Lab+symp                       | EIA Tox A&B, GDH, PCR      | >48 hours                                                                | 86    | 1.12 (0.91-1.39)        |                     |
| NA            | Lambert (2009)        | Canada      | 2005-06                             | All ages    | Lab+symp                       | EIA GDH, Tox A, Cyt        | >48 hours                                                                | 515   | 7.27 (6.66-7.92)        |                     |
| NA            | Benoit (2011)         | US          | 2007-08                             | All ages    | Lab only                       | EIA                        | >72 hours                                                                | 2156  | 7.82 (7.50-8.16)        |                     |
| NA            | Campbell (2009)       | US          | 2006                                | No details  | Lab only                       | EIA, Cyt, GDH, Cul         | >48 hours                                                                | 5700  | 7.11 (6.93-7.30)        |                     |
| NA            | Catanzaro (2012)      | US          | 2009-10                             | No details  | Lab+symp                       | EIA Tox A/B, PCR           | ≥48 hours                                                                | 13    | 2.65 (1.53-4.6)         |                     |
| NA            | Dubberke (2006)       | US          | 2003                                | No details  | Lab+symp                       | EIA Tox A&B, ICD9          | IP ≥2 days                                                               | 662   |                         | 14.55 (13.49-15.71) |
| NA            | Durkin (2015)         | US          | 2013                                | No details  | Lab                            | No details                 | ≥48 hours                                                                | 311   | 4.4 (3.94-4.92)         |                     |
| NA            | Haas (2014)           | US          | 2009-11                             | All ages    | Lab                            | No details                 | >3 days                                                                  | 390   | 7.9 (7.16-8.72)         |                     |
| NA            | Hacek (2010)          | US          | 2004-07                             | No details  | Lab only                       | EIA Tox A/B                | >48 hours                                                                |       | 8.5                     |                     |
| NA            | Haley (2014)          | US          | 2010                                | No details  | LabID database                 | LabID                      | >72 hours                                                                | 1608  | 10.99 (10.47-11.54)     |                     |
| NA            | Haley (2014)          | US          | 2010                                | No details  | Audited                        | No details                 | >72 hours                                                                | 1697  | 11.60 (11.06-12.17)     |                     |
| NA            | Han (2012)            | US          | 2009 (6m)                           | No details  | Lab only                       | EIA Tox A&B                | >48 hours                                                                | 346   | 15.45 (13.90-17.16)     |                     |
| NA            | Kassavin (2013)       | US          | 2009 (9m)                           | All ages    | Lab                            | GDH, EIA Tox A/B           | >48 hours, no IP<4 wks                                                   | 11    |                         | 0.64 (0.35-1.15)    |
| NA            | Kazakova (2006)       | US          | 2002-03                             | All ages    | Lab                            | EIA Tox A                  | ≥48 hours                                                                | 9     |                         | 1.9 (0.99-3.65)     |
| NA            | King (2011)           | US          | 2009                                | No details  | Lab+symp                       | ToxA&B                     | >48 hours                                                                | 56    |                         | 5.09 (3.91-6.61)    |
| NA            | Lipp (2012)           | US          | 2007-08                             | All ages    | ICD9+Present on admission code | No details                 | ICD9, no POA                                                             | 1913  |                         | 0.79 (0.75-0.82)    |
| NA            | McDonald (2012)       | US          | 2010                                | No details  | Lab                            | EIA ToxA/B, NAT, Other     | Hospital-onset                                                           | 9     | 7.4 (7.3-7.5)           |                     |
| NA            | McDonald (2012)       | US          | 2008-10                             | No details  | Lab+symp                       | No details                 | Hospital-onset                                                           | 118   | 9.3 (8.7-9.8)           |                     |
| NA            | Muto (2007)           | US          | 1996-99                             | No details  | Lab+symp pre-outbreak          | EIA, Cyt                   | ≥72 hours                                                                | 334   | 4.94 (4.43-5.49)        | 2.99 (2.69-3.33)    |
| NA            | Sohn (2005)           | US          | 2000-03                             | No details  | Lab+symp                       | Unknown                    | >48 hours                                                                | 267   | 10.29 (9.13-11.60)      |                     |
| NA            | Tartof (2014)         | US          | 2011-12                             | All ages    | Lab only                       | PCR                        | >48 hours                                                                | 952   | 6.78 (6.36-7.22)        | 3.54 (3.32-3.77)    |
| WP            | Mitchell (2011)       | Australia   | 2006-10                             | ≥ 2         | Lab+symp                       | EIA, Cul                   | >48 hours                                                                | 227   | 2.13 (1.87-2.43)        |                     |
| WP            | Mitchell (2014)       | Australia   | 2007-10                             | ≥ 2         | Lab+symp                       | EIA ToxA&B, PCR, Cul       | ≥48 hours                                                                | 158   | 3.20 (2.74-3.74)        | 2.68 (2.28-3.13)    |
| WP            | Hikone (2015)         | Japan       | 2011-13                             | ≥ 2         | Lab+symp                       | EIA                        | ≥48 hours, IP<12 wks                                                     | 76    | 0.8 (0.64-1)            |                     |
| WP            | Mori (2015)           | Japan       | 2010-14                             | ≥ 2         | Lab+symp                       | PCR                        | >48 hours                                                                | 35    | 1.6 (1.21-2.12)         |                     |
| WP            | Suzuki (2013)         | Japan       | 2010-11                             | No details  | Lab+symp                       | EIA                        | >48 hours                                                                | 75    | 4.71 (3.76-5.91)        |                     |
| WP            | Gweon (2014)          | Korea S     | 2011                                | All ages    | Lab+symp                       | EIA Tox A/B, PCR           | >48 hours                                                                | 320   | 9.1 (8.15-10.16)        |                     |
| <b>Adults</b> |                       |             |                                     |             |                                |                            |                                                                          |       |                         |                     |
| AF            | Rajabally (2013)      | S. Africa   | NR (1yr 4m)                         | ≥18         | Lab+symp                       | EIA Tox A, PCR             | >48/LTCF <14d                                                            | 40    |                         | 0.87 (0.64-1.19)    |
| EM            | Khan (2012)           | Qatar       | 2006-09                             | >15         | Lab+symp                       | EIA ToxA&B                 | >72 hours                                                                | 101   | 1.31 (1.08-1.60)        |                     |
| EM            | Al-Eidan (2013)       | S. Arabia   | 2011                                | Adult       | Lab only                       | ELISA ToxA&B               | >48 hours                                                                | 98    | 2.96 (2.43-3.61)        |                     |
| EU            | Khanafer (2015)       | France      | 2011-13                             | >18         | Lab+symp                       | EIA Tox A/B, Cul           | >48 hours                                                                | 118   |                         | 4.22 (3.52-5.06)    |
| EU            | Vernaz (2009)         | UK-Scotland | 2004-08                             | >18         |                                | Infection control database | >48 hours                                                                | 23    |                         | 1.5 (1-2.26)        |
| NA            | Brown (2015)          | Canada      | 2010-14                             | >18         | Lab+symp                       | PCR                        | IP ≥2 days                                                               | 255   | 5.95 (5.26-6.73)        |                     |
| NA            | Hamel (2010)          | Canada      | 2001-06                             | >16         | Lab+symp                       | EIA Tox A&B                | >72 hours                                                                | 202   | 8.09 (7.05-9.29)        | 5.36 (4.67-6.15)    |
| NA            | Oake (2010)           | Canada      | 2002-09                             | ≥15         | Lab+symp                       | ToxA/B, Cul                | IP ≥3 days                                                               | 1393  |                         | 10.18 (9.66-10.73)  |
| NA            | Dubberke [A] (2010)   | US          | 2000-06                             | ≥18         | Lab                            | EIA Tox                    | >48 hours                                                                | 2467  | 15.47 (14.88-16.10)     | 7.74 (7.44-8.05)    |
| NA            | Dubberke [B] (2010)   | US          | 2000-06                             | ≥18         | Lab                            | EIA Tox                    | >48 hours                                                                | 383   | 11.05 (10.00-12.21)     | 5.40 (4.88-5.97)    |
| NA            | Dubberke [C] (2010)   | US          | 2000-06                             | ≥18         | Lab                            | EIA Tox                    | >48 hours                                                                | 552   | 3.97 (3.65-4.32)        | 2.17 (2.00-2.36)    |
| NA            | Dubberke [D] (2010)   | US          | 2000-06                             | ≥18         | Lab                            | EIA Tox                    | >48 hours                                                                | 425   | 6.28 (5.71-6.91)        | 3.74 (3.40-4.11)    |
| NA            | Dubberke [E] (2010)   | US          | 2000-06                             | ≥18         | Lab                            | EIA Tox                    | >48 hours                                                                | 585   | 4.61 (4.25-5.00)        | 3.60 (3.32-3.91)    |

| Region | Reference               | Country   | Study yrs<br>(if <1 year:<br>mo/wk) | Age (years)     | CDI ascertainment       | Laboratory assay                  | Healthcare onset-healthcare facility-CDI rates (95% Confidence Interval) |             |                          |                         |
|--------|-------------------------|-----------|-------------------------------------|-----------------|-------------------------|-----------------------------------|--------------------------------------------------------------------------|-------------|--------------------------|-------------------------|
|        |                         |           |                                     |                 |                         |                                   | Parameters                                                               | Cases       | 10,000 patient-<br>days  | 1,000 admissions        |
| NA     | Evans (2014)            | US        | 2010-12                             | Veterans        | Lab+symp (Aud, i+r)     | EIA<br>ToxA&B,PCR,Cyt,Cul         | >48 hours                                                                | 4439        | 8.40 (8.15-8.65)         |                         |
| NA     | <i>Evans (2014)</i>     | <i>US</i> | <i>2010-12</i>                      | <i>Veterans</i> | <i>Lab (Lab)(i+r)</i>   | <i>EIA ToxA&amp;B,PCR,Cyt,Cul</i> | <i>&gt;48 hours</i>                                                      | <i>4925</i> | <i>9.32 (9.06-9.58)</i>  |                         |
| NA     | Gase (2013)             | US        | 2009 (6m)                           | ≥18             | Lab+symp (Aud, i+r)     | EIA Tox A&B                       | >72 hours                                                                | 1392        | 7.5 (7.12-7.91)          | 3.99 (3.79-4.21)        |
| NA     | <i>Gase (2013)</i>      | <i>US</i> | <i>2009 (6m)</i>                    | <i>≥18</i>      | <i>Lab only (LabID)</i> | <i>EIA Tox A&amp;B</i>            | <i>&gt;72 hours</i>                                                      | <i>1793</i> | <i>9.66 (9.22-10.11)</i> | <i>5.13 (4.90-5.38)</i> |
| NA     | Howell (2010)           | US        | 2004-08                             | ≥18             | Lab only                | Tox +                             | IP≥3 days                                                                | 665         |                          | 6.53 (6.05-7.05)        |
| NA     | Jiang (2013)            | US        | 2010-11                             | ≥18             | ICD9                    | No details                        | no POA, ICD-9                                                            | 1211        |                          | 5.36 (5.06-5.67)        |
| NA     | Knight (2010)           | US        | 2001-03                             | ≥18             | Lab only                | EIA Tox A&B                       | >72 hours                                                                | 270         | 4.96 (4.4-5.59)          |                         |
| NA     | Murphy (2012)           | US        | 2000-07                             | ≥18             | ICD9+History IP         | No details                        | no POA                                                                   | 1952        |                          | 1.10 (1.06-1.15)        |
| NA     | Price (2007)            | US        | 2002-04                             | No details      | Lab+symp                | Cyt, EIA Tox B                    | >48 hours                                                                | 213         | 7.00 (6.12-8.01)         |                         |
| NA     | Schmiedeskamp<br>(2009) | US        | 2004-05                             | ≥18             | Lab+symp (Aud)          | EIA Tox A&B                       | >5 days                                                                  | 62          |                          | 2.59 (2.02-3.32)        |
| NA     | Song (2008)             | US        | 2000-05                             | ≥18             | Lab+symp                | EIA Tox A&B,Cyt,Cul               | ≥72 hours                                                                | 741         | 7.20 (6.70-7.74)         |                         |
| NA     | Zilberberg (2011)       | US        | 2007-08                             | ≥18             | Lab only (LabID)        | EIA Tox                           | >48 hours                                                                | 4963        | 6.28 (6.1-6.45)          | 2.45 (2.39-2.52)        |
| NA     | Young-Xu (2015)         | US        | 2009-13                             | ≥18             | ICD9+Lab+Tx             | No details                        | During IP                                                                | 20046       | 6.94 (6.84-7.04)         | 10.23 (10.09-10.38)     |
| WP     | Mitchell (2014)         | Australia | 2007-10                             | ≥20             | Lab+symp                | Tox, PCR A&/B, Cul                | IP≥2 days                                                                | 149         |                          | 2.77 (2.36-3.25)        |
| WP     | Honda (2014)            | Japan     | 2010-12                             | ≥18             | Lab+symp                | EIA ToxA&B, PCR                   | >72 hours                                                                | 109         | 3.11 (2.58-3.76)         | 3.38 (2.80-4.07)        |
| WP     | Han (2014)              | S. Korea  | 2011-12                             | ≥20             | Lab+symp                | EIA ToxA&/B, Cul                  | >48 hours                                                                | 98          | 2.7 (2.22-3.29)          |                         |
| WP     | Tan (2014)              | Singapore | 2011-12 (6m)                        | ≥21             | Lab+symp (i)            | Tox A/B, GDH & PCR                | >48 hours                                                                | 33          | 5.35 (3.80-7.53)         | 3.19 (2.27-4.49)        |

**Notes:** LA: Latin America, NA: North America, EU: Europe, WP: Western Pacific, EM: Eastern Mediterranean, AF: Africa. (i) incident cases only (i+r): incident and recurrent cases, IP: in-patient, ICD9: 008.45, EIA: Enzyme Immunoassay, Tox: Toxin, &: and, /: or Cyt: Cytotoxin, GDH: glutamate dehydrogenase, Cul: Culture, PCR: polymerase chain reaction. Lab: Laboratory confirmation, Symp: symptoms confirmation, including at least one of the following diarrhoeal disease, endoscopic or histologic features.

**Supplementary Table 4. Number of CA-CDI cases per admissions and cumulative incidence rates, and cumulative incidence rates of all CDI (all ages and adults)**

| Region        | Reference           | Country      | Study years        | Age (years) | CDI ascertainment         | Laboratory assay     | CA-CDI Incidence Rate (95% Confidence Interval) |                   |                     | Any CDI Incidence Rate (95% Confidence Interval) |                                      |                           |
|---------------|---------------------|--------------|--------------------|-------------|---------------------------|----------------------|-------------------------------------------------|-------------------|---------------------|--------------------------------------------------|--------------------------------------|---------------------------|
|               |                     |              |                    |             |                           |                      | Parameters                                      | N                 | 1,000 admission     | N                                                | 100,000 population                   |                           |
| EU            | Novak (2014)        | Croatia      | 2010-11            | All ages    | Lab+symp (i)              | EIA ToxA/B           | No IP>12 wks                                    | 12                | 0.11 (0.06-0.20)    |                                                  |                                      |                           |
| EU            | Barbut (2007)       | France       | 2000-04            | All ages    | Lab only                  | Cyt,Cul,EIA,PCR      | No IP>4 wks, <72hours IP                        | 28                | 0.20 (0.14-0.30)    |                                                  |                                      |                           |
| EU            | Eckert (2013)       | France       | 2009               | No details  | Lab+symp                  | EIA,Cyt,PCR,Cul,GD H | No IP>12 wks                                    | 369               | 0.31 (0.28-0.34)    |                                                  |                                      |                           |
| EU            | Jen (2012)          | UK-England   | 1997-10            | ≥2          | ICD-10+no IP in 90d       | No details           | No IP>12 wks or LOS <72 hours                   | 21221             | 0.24 (0.24-0.24)    |                                                  |                                      |                           |
| LA            | Souza Dias (2010)   | Brazil       | 2002-03            | All ages    | Lab+symp                  | Cul,PCR              | within 48 hours IP                              | 21                | 0.71 (0.46-1.09)    |                                                  |                                      |                           |
| NA            | King (2011)         | US           | 2009               | All ages    | Lab+symp                  | ToxA&B               | No IP>12 wks                                    | 26                | 2.36 (1.61-3.47)    |                                                  |                                      |                           |
| NA            | Tartof (2014)       | US           | 2011-12            | ≥1          | Lab only                  | PCR                  | No IP>12 wks                                    | 1502              | 5.59 (5.32-5.88)    |                                                  |                                      |                           |
| <b>Adults</b> |                     |              |                    |             |                           |                      |                                                 |                   |                     |                                                  |                                      |                           |
| EU            | Jen (2012)          | UK-England   | 1997-10            | ≥2          | ICD-10+no IP in 90d       | No details           | No IP>12 wks or <72hours IP                     | 20884             | 0.26 (0.26-0.26)    |                                                  |                                      |                           |
| NA            | Armbuster (2012)    | US           | 2005-09            | Army staff  | Lab only                  | No details           | No IP>12 wks                                    | 68                | 0.97 (0.76-1.23)    |                                                  |                                      |                           |
| NA            | Bengualid (2011)    | US           | 2006-08            | ≥18         | Lab +symp                 | EIA ToxA/B           | No IP>6 months, and <48 hours                   | 22                | 0.43 (0.29-0.66)    |                                                  |                                      |                           |
| NA            | Dubberke [A] (2010) | US           | 2000-06            | ≥18         | Lab only                  | EIA Tox              | No IP>12 wks, <48 hours                         | 203               | 0.64 (0.55-0.73)    |                                                  |                                      |                           |
| NA            | Dubberke [B] (2010) | US           | 2000-06            | ≥18         | Lab only                  | EIA Tox              | No IP>12 wks, <48 hours                         | 67                | 0.94 (0.74-1.20)    |                                                  |                                      |                           |
| NA            | Dubberke [C] (2010) | US           | 2000-06            | ≥18         | Lab only                  | EIA Tox              | No IP>12 wks, <48 hours                         | 21                | 0.08 (0.05-0.13)    |                                                  |                                      |                           |
| NA            | Dubberke [D] (2010) | US           | 2000-06            | ≥18         | Lab only                  | EIA Tox              | No IP>12 wks, <48 hours                         | 78                | 0.69 (0.55-0.86)    |                                                  |                                      |                           |
| NA            | Dubberke [E] (2010) | US           | 2000-06            | ≥18         | Lab only                  | EIA Tox              | No IP>12 wks, <48 hours                         | 53                | 0.33 (0.25-0.43)    |                                                  |                                      |                           |
| NA            | Evans (2014)        | US           | 2010-12            | Veterans    | Lab+symp                  | Tox, Cul             | LabID                                           | 3363              | 0.35 (0.34-0.36)    |                                                  |                                      |                           |
| NA            | Murphy (2012)       | US           | 2000-07            | Adult       | ICD9+PD                   | No details           | 1st code, no IP>90 days                         | 5667              | 3.20 (3.12-3.29)    |                                                  |                                      |                           |
| NA            | Zilberberg (2011)   | US           | 2007-08            | ≥18         | LabID+ Chart review       | EIA Tox              | No IP>12 wks, <48 hours                         | 2254              | 1.11 (1.07-1.16)    |                                                  |                                      |                           |
| WP            | Honda (2014)        | Japan        | 2010-12            | ≥18         | Lab+symp                  | EIA,PCR              | No IP>12 wks                                    | 4                 | 0.12 (0.05-0.33)    |                                                  |                                      |                           |
|               |                     |              |                    |             |                           |                      |                                                 | <b>Parameters</b> | <b>N</b>            | <b>100,000 population</b>                        | <b>N</b>                             | <b>100,000 population</b> |
| EU            | Soes (2014)         | Denmark      | 2009-11            | ≥2          | Lab+symp                  | Tox, Cul             | No IP>12 wks, <48 hours                         | 98                | 22.43 (18.4-27.34)  |                                                  |                                      |                           |
| EU            | Hensgens (2014)     | Netherlands  | 2010-12            | ≥2          | Lab+symp                  | Tox, Cyt             | GP-identified                                   | 194               | 6.70 (5.82-7.71)    |                                                  |                                      |                           |
| EU            | Reigadas (2015)     | Spain        | 2013               | ≥2          | Lab+symp                  | Tox                  | No IP>12 wks, <72 hours                         | 76                | 47.8 (38.18-59.85)  |                                                  |                                      |                           |
| EU            | Fellmeth (2010)     | UK-Eng       | 2008-09            | 2-64        | Lab only                  | EIA Tox A&B          | Community onset                                 | 54                | 12.92 (9.89-16.87)  |                                                  |                                      |                           |
| EU            | Wilcox (2008)       | UK-Eng Leeds | 1999               | All ages    | Lab+symp                  | Cul,Cyt              | GP-identified                                   | 21                | 29.50 (19.23-45.25) |                                                  |                                      |                           |
| EU            | Wilcox (2008)       | UK-Eng Truro | 1999               | All ages    | Lab+symp                  | Cul,Cyt              | GP-identified                                   | 21                | 20.20 (13.17-30.98) |                                                  |                                      |                           |
| EU            | Taori (2014)        | UK-Scotland  | 2010-11            | All ages    | Lab                       | Two-step alg         | No HCF >12wks                                   | 42                | 6.4 (4.73-8.66)     | 335                                              | 50.39 (45.28-56.09)                  |                           |
| NA            | Lambert (2009)      | Canada       | 2005-06            | All ages    | Lab                       | Tox                  | No IP>12 wks                                    | 275               | 23.40 (20.79-26.34) | 1006                                             | 85.60 (80.47-91.06)                  |                           |
| NA            | CDC (2005)          | US           | 2004-05            | No details  | Voluntary Survey          | Tox,Cul              | No IP>12 wks, <72 hours                         | 276               | 7.60 (6.75-8.55)    |                                                  |                                      |                           |
| NA            | CDC (2008)          | US           | 2006               | All ages    | Lab+symp                  | EIA                  | No IP>12 wks, <72 hours                         | 241               | 6.90 (6.08-7.83)    |                                                  |                                      |                           |
| NA            | Chandler (2007)     | US           | 1995-07 (95,02 IR) | No details  | Lab only                  | No details           |                                                 |                   |                     | 1686                                             | 24.5 (22.9-26.22)                    |                           |
| NA            | Khanna (2012)       | US           | 1991-05            | All ages    | ICD9 (OP/IP) chart review | (Cyt,EIA)            | No IP>12 wks, <48 hours                         | 157               | 9.60 (8.21-11.23)   | 385                                              | 25.2 (22.80-27.85)                   |                           |
| NA            | Kuntz (2011)        | US           | 2004-07            | All ages    | ICD9 (OP/IP)              | No details           | 1st code, IP<12 wks                             | 304               | 11.16 (9.98-12.49)  | 684                                              | 25.12 (23.3-27.08)                   |                           |
| NA            | Lessa (2015)        | US           | 2011               | ≥1          | Lab                       | Tox,PCR              | No IP>12 wks                                    | 15970             | 0                   | 453000                                           | 51.9 (43.2-60.5) 147.2 (129.1-165.3) |                           |
| NA            | Kuntz (2015)        | USA          | 2005-12            | All ages    | ICD-9+Tx                  | GDH, Tox A/B, PCR    | OP, No IP>12 wks                                |                   |                     | 5990                                             | 159 (154.97-163.13)                  |                           |
| WP            | Mitchell (2012)     | Australia    | 2010-11            | >2          | Lab+symp                  | EIA,Cul ToxA/B,PCR   | No IP>12 wks                                    | 71                | 6.98 (5.02-9.7)     | 259                                              | 45.11 (39.64-51.34)                  |                           |



| Region | Reference              | Country     | Study years | Age (years) | CDI ascertainment              | Laboratory assay                     | CA-CDI Incidence Rate (95% Confidence Interval) |   |                 | Any CDI Incidence Rate (95% Confidence Interval) |                        |
|--------|------------------------|-------------|-------------|-------------|--------------------------------|--------------------------------------|-------------------------------------------------|---|-----------------|--------------------------------------------------|------------------------|
|        |                        |             |             |             |                                |                                      | Parameters                                      | N | 1,000 admission |                                                  |                        |
| EU     | Alcalá (2011)          | Spain       | 2007        | No details  | Lab only                       | EIA, Cyt, PCR (ToxB), Cul            |                                                 |   |                 | 4123                                             | 13.42 (13.02-13.84)    |
| NA     | Babey                  | Canada      | 2012-14     | ≥2          | Lab+symp                       | Tox                                  |                                                 |   |                 | 34                                               | 24.29 (17.35-33.99)    |
| EU     | ISP-WIV                | Belgium     | 1999-12     | All ages    | ICD-9                          |                                      |                                                 |   |                 | 3472                                             | 32.7 (31.63-33.81)     |
| EU     | HPSC (2013)            | Ireland     | 2013        | All ages    | Lab+symp                       | EIA+GDH&PCR                          |                                                 |   |                 | 1853                                             | 39.38 (37.61-41.23)    |
| EU     | NIHW                   | Finland     | 2008-12     | No details  | Mandatory Surv (IP)            | Tox+                                 |                                                 |   |                 | 5489                                             | 103.05 (100.34-105.83) |
| EU     | Lyytikainen (2009)     | Finland     | 1996-04     | All ages    | ICD-9                          |                                      |                                                 |   |                 | 10958                                            | 23.6 (22.31-24.97)     |
| EU     | PHE                    | UK England  | 2007-12     | ≥2          | Lab+symp M-Surv                | EIA+GDH                              |                                                 |   |                 | 199146                                           | 47.15 (46.55-47.76)    |
| EU     | Rodriguez-Pardo (2013) | Spain       | 2009        | All ages    | Lab+symp                       | Tox A&B, Cul                         |                                                 |   |                 | 365                                              | 22.50 (20.31-24.93)    |
| EU     | Folkhälsomyndigheten   | Sweden      | 2014        | All ages    | Voluntary surv programme       |                                      |                                                 |   |                 | 7691                                             | 79 (77.22-80.82)       |
| EU     | Vesteinsdottir (2012)  | Iceland     | 2010-11     | All ages    | Lab only                       | ELISA Tox A&B                        |                                                 |   |                 | 146                                              | 45.85 (38.99-53.92)    |
| WP     | Ferguson (2011)        | Australia   | 2008-09     | All ages    | Lab Survey                     | Various: Cul, EIA A&B, GDH, PCR (6%) |                                                 |   |                 | 944                                              | 21.9 (20.5-23.3)       |
| WP     | Ferguson (2011)        | New Zealand | 2008-09     | All ages    | Lab Survey                     | Various: Cul, EIA A&B, GDH, PCR (6%) |                                                 |   |                 | 5625                                             | 25.6 (24.9-26.3)       |
| NA     | Smith (2011)           | US          | 1999-08     | All ages    | ICD9 008.45                    | No details                           |                                                 |   |                 | 19174                                            | 43.82 (41.89-45.84)    |
| NA     | VerLee (2012)          | US          | 2002-08     | All ages    | ICD9 008.45                    | No details                           |                                                 |   |                 | 68686                                            | 98.7 (98.0-99.5)       |
| NA     | Lucado (2012)          | US          | 1993-09     | All ages    | ICD9 008.45                    | No details                           |                                                 |   |                 | 336471                                           | 107.6 (107.3-108.0)    |
| Adults |                        |             |             |             |                                |                                      |                                                 |   |                 |                                                  |                        |
| NA     | CDC (2008)             | US          | 2006        | Adults      | Voluntary Survey               | EIA                                  | No IP>12 wks, <72 hours                         |   |                 | 223                                              | 7.94 (6.97-9.06)       |
| NA     | Gutierrez (2013)       | US          | 1998-10     | Army staff  | ICD9+history admissions review | No details                           | No IP>12w                                       |   |                 | 1018                                             | 5.50 (5.17-5.85)       |
| NA     | Murphy (2012)          | USA         | 2000-07     | ≥18         | ICD9+history admissions review | No details                           | No IP>12w                                       |   |                 | 5667                                             | 14.3 (13.94-14.67)     |
| NA     | Kutty (2010)           | US          | 2005        | ≥18         | Lab+symp                       | EIA Tox A&B                          | No IP>8 wks, OP/3-4 days IP                     |   |                 | 73                                               | 46.00 (36.57-57.86)    |
| NA     | Lessa (2015)           | US          | 2011        | ≥18         | Lab+symp                       | PCR, Tox                             | No IP>12 wks or <72hours IP                     |   |                 | 147200                                           | 61.88 (61.57-62.19)    |
| EU     | Dial (2005)            | UK          | 1994-04     | ≥18         | Lab/symp                       | No details                           | GP-identified in database                       |   |                 | 1233                                             | 8.64 (8.17-9.14)       |
| EU     | Soes (2014)            | Denmark     | 2009-11     | Adults      | Lab+symp                       | Tox, Cul                             | No IP>12 wks or <72hours IP                     |   |                 | 92                                               | 27.08 (22.07-33.23)    |
| NA     | Young-Xu (2015)        | USA         | 2009-13     | ≥18         | ICD9+Lab+Tx                    | No details                           | No IP >12wks                                    |   |                 | 5168                                             | 91.72 (89.23-94.29)    |
| EU     | Taori (2014)           | UK-Scotland | 2010-11     | Adults      | Lab                            | Two-step alg                         | No HCF >12wks                                   |   |                 |                                                  | 7.3 (NR)               |
| EU     | Vesteinsdottir (2012)  | Iceland     | 2010-11     | >18         | Lab only                       | ELISA Tox A&B                        | No IP>6 wks, no nursing home history            |   |                 | 30                                               | 12.60 (8.81-18.02)     |
| NA     | Kuntz (2012)           | US          | 2007        | ≥20         | ICD9+Lab                       | EIA Tox                              |                                                 |   |                 | 870                                              | 149 (139.42-159.24)    |
| NA     | Rhee (2014)            | US          | 2012        | >1          | Lab                            | EIA Tox, GDH                         |                                                 |   |                 | 1666                                             | 285.03 (276.73-293.58) |
| EU     | Kotila (2011)          | Finland     | 2008        | ≥15         | Mandatory & Enhanced-Surv (IP) | Cul, Tox                             |                                                 |   |                 | 6201                                             | 137.1 (133.76-140.53)  |
| EU     | PHE                    | UK-England  | 2006-14     | Adults      | Lab                            |                                      |                                                 |   |                 | 26980                                            | 62.01 (61.28-62.75)    |
| WP     | Mitchell (2012)        | Australia   | 2010-11     | ≥20         | Lab+symp                       | Cul,EIA Tox,PCR                      |                                                 |   |                 | 444                                              | 58.93 (51.65-67.24)    |
| NA     | Lucado (2012)          | US          | 1993-09     | ≥20         | ICD9 008.45                    | No details                           |                                                 |   |                 | 328053                                           | 137.8 (137.3-138.3)    |
| NA     | Smith (2011)           | US          | 1999-08     | ≥15         | ICD9 008.45                    | No details                           |                                                 |   |                 | 18503                                            | 54.28 (53.51-55.07)    |
| NA     | VerLee (2012)          | US          | 2002-08     | ≥20         | ICD9 008.45                    | No details                           |                                                 |   |                 | 8834                                             | 16.23 (15.36-17.16)    |
| NA     | Zilberberg (2008)      | US          | 2000-05     | ≥18         | ICD9 008.45                    | No details                           |                                                 |   |                 | 1200343                                          | 92.43 (92.26-92.59)    |

| Region                                                                                                                                                                                                                                                                                                                                                                                                                                                                                                                                                                                                            | Reference | Country | Study years | Age (years) | CDI ascertainment | Laboratory assay | CA-CDI Incidence Rate (95% Confidence Interval) |   | Any CDI Incidence Rate (95% Confidence Interval) |
|-------------------------------------------------------------------------------------------------------------------------------------------------------------------------------------------------------------------------------------------------------------------------------------------------------------------------------------------------------------------------------------------------------------------------------------------------------------------------------------------------------------------------------------------------------------------------------------------------------------------|-----------|---------|-------------|-------------|-------------------|------------------|-------------------------------------------------|---|--------------------------------------------------|
|                                                                                                                                                                                                                                                                                                                                                                                                                                                                                                                                                                                                                   |           |         |             |             |                   |                  | Parameters                                      | N | 1,000 admission                                  |
| <p><b>Notes:</b> LA: Latin America, NA: North America, EU: Europe, WP: Western Pacific, EM: Eastern Mediterranean, AF: Africa. (i) incident cases only (i+r): incident and recurrent cases, IP: in-patient, ICD9: 008.45, ICD10: A047, EIA: Enzyme Immunoassay, Tox: Toxin, &amp;: and, /: orCyt: Cytotoxin, GDH: glutamate dehydrogenase, Cul: Culture, PCR: polymerase chain reaction. Lab: Laboratory confirmation, Symp: symptoms confirmation, including at least one of the following diarrhoeal disease, endoscopic or histologic features, or unformed stool. Surv: Surveillance, LOS: Length of stay</p> |           |         |             |             |                   |                  |                                                 |   |                                                  |

**Supplementary Table 5. Number of any CDI cases per admissions (all ages and adults)**

| Region | Reference              | Country     | Study yrs<br>(if <1 year:<br>months /wks) | Age (years) | CDI ascertainment             | Laboratory confirmation     | All-CDI Incidence Rate (95%<br>Confidence Interval) |                  |
|--------|------------------------|-------------|-------------------------------------------|-------------|-------------------------------|-----------------------------|-----------------------------------------------------|------------------|
|        |                        |             |                                           |             |                               |                             | Cases                                               | 1,000 admissions |
| EM     | Al-Tawfiq (2010)       | S. Arabia   | 2007-08                                   | All ages    | Lab+symp                      | ELISA Tox A&B               | 42                                                  | 1.05 (0.78-1.42) |
| EU     | ISP-WIV                | Belgium     | 2008-14                                   | ≥0          | M-Surv (IP)                   | No details                  | 14672                                               | 1.62 (1.59-1.64) |
| EU     | Ivanova (2011)         | Bulgaria    | 2008-10                                   | > 2         | Lab+symp (i)                  | EIA ToxA&B, Cul             | 15                                                  | 0.79 (0.48-1.31) |
| EU     | Novak (2014)           | Croatia     | 2010-11                                   | All ages    | Lab+symp (i)                  | EIA A&B                     | 54                                                  | 0.51 (0.39-0.67) |
| EU     | Barbut (2007)          | France      | 2000-04                                   | All ages    | Lab+symp                      | Cyt, Cul, EIA, PCR          | 151                                                 | 1.10 (0.94-1.29) |
| EU     | Eckert (2013)          | France      | 2009 (6m)                                 | No details  | Voluntary Survey Lab+symp (i) | EIA Tox, Cyt, PCR, Cul, GDH | 1316                                                | 1.10 (1.04-1.16) |
| EU     | Jones (2012)           | France      | 2000-10                                   | No details  | Lab                           | Cyt, Cul                    | 632                                                 | 1.99 (1.84-2.16) |
| EU     | KISS (2015)            | Germany     | 2007-14                                   | All ages    | V-Surv                        | No details                  | 95545                                               | 4.83 (4.8-4.86)  |
| EU     | Hensgens (2013)        | Netherlands | 2006-09                                   | All ages    | Lab+symp (i)                  | ELISA Tox A&B, Cyt          | 1366                                                | 1.33 (1.26-1.40) |
| EU     | Kooi [01] (2008)       | Netherlands | 2004-05                                   | No details  | Lab only                      | Tox                         | 34                                                  | 1.71 (1.22-2.39) |
| EU     | Kooi [02] (2008)       | Netherlands | 2004-05                                   | No details  | Lab only                      | Tox                         | 58                                                  | 1.3 (1.01-1.68)  |
| EU     | Kooi [03] (2008)       | Netherlands | 2004-05                                   | No details  | Lab only                      | Tox                         | 136                                                 | 3.59 (3.04-4.25) |
| EU     | Kooi [04] (2008)       | Netherlands | 2004-05                                   | No details  | Lab only                      | Tox                         | 50                                                  | 2.6 (1.97-3.43)  |
| EU     | Kooi [05] (2008)       | Netherlands | 2004-05                                   | No details  | Lab only                      | Tox                         | 83                                                  | 3.36 (2.71-4.17) |
| EU     | Kooi [06] (2008)       | Netherlands | 2004-05                                   | No details  | Lab only                      | Tox                         | 29                                                  | 1.47 (1.02-2.12) |
| EU     | Kooi [07] (2008)       | Netherlands | 2004-05                                   | No details  | Lab only                      | Tox                         | 24                                                  | 0.59 (0.4-0.88)  |
| EU     | Kooi [08] (2008)       | Netherlands | 2004-05                                   | No details  | Lab only                      | Tox                         | 21                                                  | 0.49 (0.32-0.75) |
| EU     | Kooi [09] (2008)       | Netherlands | 2004-05                                   | No details  | Lab only                      | Tox                         | 65                                                  | 1.2 (0.94-1.53)  |
| EU     | Kooi [10] (2008)       | Netherlands | 2004-05                                   | No details  | Lab only                      | Tox                         | 94                                                  | 3.01 (2.46-3.68) |
| EU     | Kooi [11] (2008)       | Netherlands | 2004-05                                   | No details  | Lab only                      | Tox                         | 34                                                  | 1.03 (0.74-1.44) |
| EU     | Kooi [12] (2008)       | Netherlands | 2004-05                                   | No details  | Lab only                      | Tox                         | 30                                                  | 1.16 (0.81-1.66) |
| EU     | Kooi [13] (2008)       | Netherlands | 2004-05                                   | No details  | Lab only                      | Tox                         | 109                                                 | 3.79 (3.14-4.58) |
| EU     | Kooi [14] (2008)       | Netherlands | 2004-05                                   | No details  | Lab only                      | Tox                         | 19                                                  | 0.81 (0.52-1.27) |
| EU     | Kooi [15] (2008)       | Netherlands | 2004-05                                   | No details  | Lab only                      | Tox                         | 20                                                  | 1.07 (0.69-1.66) |
| EU     | Kooi [16] (2008)       | Netherlands | 2004-05                                   | No details  | Lab only                      | Tox                         | 1                                                   | 0.06 (0.01-0.43) |
| EU     | Kooi [17] (2008)       | Netherlands | 2004-05                                   | No details  | Lab only                      | Tox                         | 33                                                  | 1.05 (0.75-1.48) |
| EU     | Kooi [18] (2008)       | Netherlands | 2004-05                                   | No details  | Lab only                      | Tox                         | 65                                                  | 1.97 (1.55-2.51) |
| EU     | Kooi [19] (2008)       | Netherlands | 2004-05                                   | No details  | Lab only                      | Tox                         | 9                                                   | 0.52 (0.27-1)    |
| EU     | Kooi [20] (2008)       | Netherlands | 2004-05                                   | No details  | Lab only                      | Tox                         | 60                                                  | 1.35 (1.05-1.74) |
| EU     | Kooi [21] (2008)       | Netherlands | 2004-05                                   | No details  | Lab only                      | Tox                         | 44                                                  | 4.9 (3.65-6.59)  |
| EU     | Kooi [22] (2008)       | Netherlands | 2004-05                                   | No details  | Lab only                      | Tox                         | 16                                                  | 0.38 (0.23-0.62) |
| EU     | Kooi [23] (2008)       | Netherlands | 2004-05                                   | No details  | Lab only                      | Tox                         | 30                                                  | 0.69 (0.48-0.99) |
| EU     | Kooi [24] (2008)       | Netherlands | 2004-05                                   | No details  | Lab only                      | Tox                         | 44                                                  | 1.07 (0.8-1.44)  |
| EU     | Paltansing [1] (2007)  | Netherlands | 2005                                      | All ages    | Lab+symp (i)                  | Tox A&B EIA                 | 11                                                  | 4.60 (2.55-8.31) |
| EU     | Paltansing [2] (2007)  | Netherlands | 2005                                      | All ages    | Lab+symp (i)                  | Tox A&B EIA                 | 13                                                  | 3.70 (2.15-6.37) |
| EU     | Paltansing [3] (2007)  | Netherlands | 2005                                      | All ages    | Lab+symp (i)                  | Tox A&B Cyt                 | 3                                                   | 1.60 (0.52-4.96) |
| EU     | Paltansing [4] (2007)  | Netherlands | 2005                                      | All ages    | Lab+symp (i)                  | Tox A&B Cyt                 | 6                                                   | 1.70 (0.76-3.78) |
| EU     | Paltansing [5] (2007)  | Netherlands | 2005                                      | All ages    | Lab+symp (i)                  | Tox A&B EIA                 | 4                                                   | 1.40 (0.53-3.73) |
| EU     | Paltansing [6] (2007)  | Netherlands | 2005                                      | All ages    | Lab+symp (i)                  | Tox A&B Cyt                 | 7                                                   | 1.30 (0.62-2.73) |
| EU     | Paltansing [7] (2007)  | Netherlands | 2005                                      | All ages    | Lab+symp (i)                  | Tox A&B Cyt                 | 3                                                   | 1.40 (0.45-4.34) |
| EU     | Paltansing [8] (2007)  | Netherlands | 2005                                      | All ages    | Lab+symp (i)                  | Tox A&B EIA                 | 1                                                   | 0.30 (0.04-2.13) |
| EU     | Paltansing [9] (2007)  | Netherlands | 2005                                      | All ages    | Lab+symp (i)                  | Tox A&B EIA + Cyt           | 4                                                   | 0.20 (0.08-0.53) |
| EU     | Paltansing [10] (2007) | Netherlands | 2005                                      | All ages    | Lab+symp (i)                  | Tox A&B Cyt                 | 3                                                   | 0.40 (0.13-1.24) |
| EU     | Paltansing [11] (2007) | Netherlands | 2005                                      | All ages    | Lab+symp (i)                  | Tox A&B Cyt                 | 2                                                   | 0.50 (0.13-2.00) |
| EU     | Paltansing [12] (2007) | Netherlands | 2005                                      | All ages    | Lab+symp (i)                  | Tox A&B Cyt                 | 6                                                   | 1.40 (0.63-3.12) |
| EU     | Paltansing [13] (2007) | Netherlands | 2005                                      | All ages    | Lab+symp (i)                  | Tox A&B EIA                 | 4                                                   | 1.20 (0.45-3.20) |
| EU     | Czepiel (2015)         | Poland      | 2008-14                                   | No details  | Lab+symp                      | Antigen and Tox A/B         | 1009                                                | 2.87 (2.7-3.05)  |
| EU     | Alcalá (2011)          | Spain       | 2007                                      | No details  | Lab only                      | EIA, Cyt, PCR (ToxB), Cul   | 4123                                                | 1.71 (1.66-1.76) |
| EU     | Rodriguez-Pardo (2013) | Spain       | 2009                                      | All ages    | Lab+symp                      | Tox A&B, Cul                | 365                                                 | 1.22 (1.10-1.35) |

| Region | Reference              | Country     | Study yrs<br>(if <1 year:<br>months /wks) | Age (years) | CDI ascertainment      | Laboratory confirmation | All-CDI Incidence Rate (95%<br>Confidence Interval) |                     |
|--------|------------------------|-------------|-------------------------------------------|-------------|------------------------|-------------------------|-----------------------------------------------------|---------------------|
|        |                        |             |                                           |             |                        |                         | Cases                                               | 1,000 admissions    |
| EU     | Rodriguez-Pardo (2013) | Spain       | 2009                                      | All ages    | Lab+symp               | Tox A&B, Cul            | 125                                                 | 2.61 (2.19-3.11)    |
| EU     | Rodriguez-Pardo (2013) | Spain       | 2009                                      | All ages    | Lab+symp               | Tox A&B, Cul            | 46                                                  | 1.92 (1.44-2.57)    |
| EU     | Rodriguez-Pardo (2013) | Spain       | 2009                                      | All ages    | Lab+symp               | Tox A&B, Cul            | 53                                                  | 1.1 (0.84-1.44)     |
| EU     | Rodriguez-Pardo (2013) | Spain       | 2009                                      | All ages    | Lab+symp               | Tox A&B, Cul            | 72                                                  | 2.12 (1.68-2.67)    |
| EU     | Rodriguez-Pardo (2013) | Spain       | 2009                                      | All ages    | Lab+symp               | Tox A&B, Cul            | 3                                                   | 0.24 (0.08-0.75)    |
| EU     | Rodriguez-Pardo (2013) | Spain       | 2009                                      | All ages    | Lab+symp               | Tox A&B, Cul            | 3                                                   | 0.15 (0.05-0.45)    |
| EU     | Rodriguez-Pardo (2013) | Spain       | 2009                                      | All ages    | Lab+symp               | Tox A&B, Cul            | 11                                                  | 5.97 (3.31-10.79)   |
| EU     | Rodriguez-Pardo (2013) | Spain       | 2009                                      | All ages    | Lab+symp               | Tox A&B, Cul            | 13                                                  | 0.82 (0.48-1.42)    |
| EU     | Rodriguez-Pardo (2013) | Spain       | 2009                                      | All ages    | Lab+symp               | Tox A&B, Cul            | 4                                                   | 0.21 (0.08-0.56)    |
| EU     | Rodriguez-Pardo (2013) | Spain       | 2009                                      | All ages    | Lab+symp               | Tox A&B, Cul            | 5                                                   | 0.33 (0.14-0.79)    |
| EU     | Rodriguez-Pardo (2013) | Spain       | 2009                                      | All ages    | Lab+symp               | Tox A&B, Cul            | 5                                                   | 0.74 (0.31-1.79)    |
| EU     | Rodriguez-Pardo (2013) | Spain       | 2009                                      | All ages    | Lab+symp               | Tox A&B, Cul            | 15                                                  | 0.71 (0.43-1.17)    |
| EU     | Rodriguez-Pardo (2013) | Spain       | 2009                                      | All ages    | Lab+symp               | Tox A&B, Cul            | 2                                                   | 0.19 (0.05-0.75)    |
| EU     | Rodriguez-Pardo (2013) | Spain       | 2009                                      | All ages    | Lab+symp               | Tox A&B, Cul            | 0.05000                                             | 0 (0-30.62)         |
| EU     | Rodriguez-Pardo (2013) | Spain       | 2009                                      | All ages    | Lab+symp               | Tox A&B, Cul            | 1                                                   | 0.16 (0.02-1.12)    |
| EU     | Fenner (2008)          | Switzerland | 2006-07                                   | All ages    | Lab only (i)           | EIA ToxA/B              | 78                                                  | 2.65 (2.12-3.31)    |
| EU     | Aldeyab (2009)         | UK-N.IRE    | 2002-07                                   | ≥2          | Lab+symp               | Tox A&B                 | 393                                                 | 1.93 (1.75-2.13)    |
| LA     | Goorhuis (2009)        | Argentina   | 2000-05                                   | No details  | Lab+symp               | Cul, EIA Tox, PCR       | 153                                                 | 5.45 (4.65-6.39)    |
| LA     | Souza Dias (2010)      | Brazil      | 2002-03                                   | All ages    | Lab+symp               | EIA A&B                 | 138                                                 | 4.74 (4.01-5.61)    |
| LA     | Camacho-O (2009)       | Mexico      | 2003-07                                   | No details  | Lab+symp               | EIA Tox                 | 170                                                 | 5.04 (4.34-5.86)    |
| NA     | Catanzaro (2012)       | US          | 2009-10                                   | No details  | Lab only               | EIA, Cyt, GDH, Cul      | 57                                                  | 4.94 (3.82-6.41)    |
| NA     | Kassavin (2013)        | US          | 2009 (9m)                                 | All ages    | Lab+clinical suspicion | GDH, EIA Tox A/B        | 88                                                  | 5.10 (4.14-6.29)    |
| NA     | King (2011)            | US          | 2009                                      | No details  | Lab+symp               | ToxA&B                  | 115                                                 | 10.45 (8.70-12.54)  |
| NA     | Tan (2007)             | US          | 2000-04                                   | All ages    | Lab+symp               | Tox                     | 13394                                               | 5.66 (5.57-5.76)    |
| NA     | Tartof (2014)          | US          | 2011-12                                   | All ages    | Lab only               | PCR                     | 4880                                                | 18.16 (17.66-18.68) |
| EU     | Jones (2012)           | France      | 2000-10                                   | No details  | ICD 10                 | NA                      | 284                                                 | 0.90 (0.80-1.01)    |
| EU     | Stausberg (2011)       | Germany     | 2006                                      | All ages    | ICD-9                  |                         | 36215                                               | 2.39 (2.37-2.41)    |
| NA     | Daneman (2012)         | Canada      | 2002-08                                   | All ages    | ICD10                  | No details              | 33634                                               | 5.54 (5.48-5.60)    |
| NA     | Gilca (2010)           | Canada      | 1998-01                                   | No details  | ICD9                   | No details              | 10304                                               | 5.80 (5.69-5.92)    |
| NA     | Chandler (2007)        | US          | 1995-07                                   | No details  | Lab only               | No details              | 442                                                 | 1.08 (1.07-1.09)    |
| NA     | Elixhauser (2008)      | US          | 1993-05                                   | No details  | ICD9                   | No details              | 2773521                                             | 7.69 (7.6-7.72)     |
| NA     | Fashner (2012)         | US          | 2000-09                                   | All ages    | ICD-9                  |                         | 72                                                  | 5.38 (4.27-6.78)    |
| NA     | Halabi (2013)          | US          | 2001-10                                   | All ages    | ICD9                   | No details              | 301200                                              | 6.82 (6.82-6.83)    |
| NA     | Harbrecht (2012)       | US          | 2003-05                                   | All ages    | ICD9                   | No details              |                                                     | 4.92 (4.8-5.0)      |
| NA     | O'Brien (2007)         | US          | 2000                                      | All ages    | ICD-9                  |                         | 1036                                                | 9.35 (8.8-9.94)     |
| NA     | Ricciardi (2007)       | US          | 1993-03                                   | All ages    | ICD9                   | No details              | 299453                                              | 3.83 (3.82-3.85)    |
| NA     | Ricciardi (2008)       | US          | 2000-03                                   | All ages    | ICD9                   | No details              | 80619                                               | 3.97 (3.95-4.00)    |
| WP     | Cheng (2015)           | Hong Kong   | 2009                                      | All ages    | Lab                    | Cul, Cyt                | 307                                                 | 0.95 (0.85-1.06)    |
| WP     | Chan (2011)            | Singapore   | 2007                                      | All ages    | ICD9                   |                         | 141                                                 | 2.50 (2.12-2.95)    |
| WP     | Chan (2011)            | Singapore   | 2007                                      | All ages    | Lab                    | ELISA Tox A&B           | 276                                                 | 4.90 (4.35-5.51)    |
| WP     | Koh (2007)             | Singapore   | 2002-03 (5m)                              | All ages    | Lab+symp (IP)          | EIA A&B, Cul            | 88                                                  | 3.20 (2.60-3.94)    |
| Adults |                        |             |                                           |             |                        |                         |                                                     |                     |
| AF     | Rajabally (2013)       | S. Africa   | NR (1yr 4m)                               | ≥18         | Lab+symp               | EIA Tox A, PCR          | 59                                                  | 1.28 (0.99-1.66)    |
| EU     | Baliyar (2014)         | Czech Rep   | 2006-08                                   | ≥18         | Lab+symp               | ELISA, EIA ToxA/B       | 183                                                 | 0.97 (0.84-1.13)    |
| EU     | Skyum (2014)           | Denmark     | 2012-13                                   | ≥16         | Lab+symp               | PCR, Cul                | 38                                                  | 2.17 (1.58-2.98)    |
| EU     | Drudy (2007)           | Ireland     | 2004 (6m)                                 | Adult       | Lab+symp               | ELISA Tox A&B, Cyt      | 85                                                  | 7.0 (5.66-8.66)     |
| EU     | Laza (2015)            | Romania     | 2013-14                                   | ≥18         | Lab+symp               | EIA Tox A&B             | 219                                                 | 19.65 (17.21-22.44) |
| NA     | Armbruster (2012)      | US          | 2005-09                                   | Army staff  | Lab only               | No details              | 232                                                 | 3.30 (2.90-3.75)    |
| NA     | Bengualid (2011)       | US          | 2006-08                                   | ≥18         | Lab+symp               | EIA Tox A&B             | 352                                                 | 6.90 (6.22-7.66)    |
| NA     | Dubberke [A] (2010)    | US          | 2000-06                                   | ≥18         | Lab only               | EIA Tox                 | 3928                                                | 12.32 (11.94-12.71) |

| Region | Reference            | Country   | Study yrs<br>(if <1 year:<br>months /wks) | Age (years) | CDI ascertainment         | Laboratory confirmation | All-CDI Incidence Rate (95%<br>Confidence Interval) |                     |
|--------|----------------------|-----------|-------------------------------------------|-------------|---------------------------|-------------------------|-----------------------------------------------------|---------------------|
|        |                      |           |                                           |             |                           |                         | Cases                                               | 1,000 admissions    |
| NA     | Dubberke [B] (2010)  | US        | 2000-06                                   | ≥18         | Lab only                  | EIA Tox                 | 541                                                 | 7.62 (7.01-8.30)    |
| NA     | Dubberke [C] (2010)  | US        | 2000-06                                   | ≥18         | Lab only                  | EIA Tox                 | 882                                                 | 3.47 (3.25-3.71)    |
| NA     | Dubberke [D] (2010)  | US        | 2000-06                                   | ≥18         | Lab only                  | EIA Tox                 | 621                                                 | 5.47 (5.05-5.91)    |
| NA     | Dubberke [E] (2010)  | US        | 2000-06                                   | ≥18         | Lab only                  | EIA Tox                 | 934                                                 | 5.75 (5.40-6.13)    |
| NA     | Evans (2014)         | US        | 2010-12                                   | Veterans    | Lab+symp (Audited, i+r)   | EIA Tox A&B,PCR,Cyt,Cul | 9642                                                | 10.06 (9.86-10.26)  |
| NA     | Gase (2013)          | US        | 2009 (6m)                                 | ≥18         | Lab+symp (Audited, i+r)   | EIA Tox A&B             | 3301                                                | 9.45 (9.13-9.78)    |
| NA     | Jayatilaka (2007)    | US        | 2001-05                                   | ≥18         | ICD9                      | No details              | 519                                                 | 6.75 (6.19-7.36)    |
| NA     | Jiang (2013)         | US        | 2010-2011                                 | ≥18         | ICD9                      | No details              | 4531                                                | 20.05 (19.47-20.64) |
| NA     | Murphy (2012)        | US        | 2000-07                                   | ≥18         | ICD9                      | No details              | 10750                                               | 6.08 (5.96-6.19)    |
| NA     | Reveles (2014)       | US        | 2001-10                                   | ≥18         | ICD9                      | No details              | 2196446                                             | 6.91 (6.90-6.92)    |
| NA     | Salazar (2009)       | US        | 2005-07                                   | ≥18         | Lab+symp                  | EIA Tox                 | 467                                                 | 3.28 (3.00-3.59)    |
| NA     | Schmiedeskamp (2009) | US        | 2004-05                                   | ≥18         | Lab+symp (Audited)        | EIA Tox A&B             | 118                                                 | 4.93 (4.12-5.91)    |
| NA     | Schmiedeskamp (2009) | US        | 2004-05                                   | ≥18         | ICD9                      | No details              | 147                                                 | 6.15 (5.23-7.22)    |
| NA     | Tartof (2014)        | US        | 2011-12                                   | ≥19         | Lab only                  | PCR                     | 4880                                                | 18.16 (17.66-18.68) |
| NA     | Welker (2012)        | US        | 2006-07                                   | >18         | Lab only+symp (Audited)   | EIA Tox A&B             | 384                                                 | 16.30 (14.75-18.01) |
| NA     | Welker (2012)        | US        | 2006-07                                   | >18         | ICD9                      | No details              | 446                                                 | 18.98 (17.30-20.83) |
| NA     | Zilberberg (2011)    | US        | 2007-08                                   | ≥18         | LabID database            | EIA Tox                 | 9803                                                | 4.85 (4.75-4.94)    |
| NA     | Chopra (2015)        | US        | 2012                                      | Adults      | ICD-9                     | No details              | 615                                                 | 11.98 (11.07-12.96) |
| NA     | Cooper (2013)        | US        | 2008-11                                   | Adults      | Lab only                  | Toxin positive          | 488                                                 | 11.03 (10.09-12.06) |
| NA     | Young-Xu (2015)      | US        | 2009-13                                   | ≥18         | ICD-9-IP, Lab, Tx records | No details              | 32593                                               | 16.64 (16.46-16.82) |
| WP     | Honda (2014)         | Japan     | 2010-12                                   | ≥18         | Lab+symp                  | EIA ToxA&B, PCR         | 126                                                 | 3.90 (3.28-4.65)    |
| WP     | Koh (2007)           | Singapore | 2002-03 (5m)                              | ≥20         | Lab+symp (IP)             | EIA A&B, Cul            | 85                                                  | 3.22 (2.60-3.98)    |
| WP     | Tan (2014)           | Singapore | 2011-12 (6m)                              | ≥21         | Lab+symp (i)              | Tox A/B, GDH & PCR      | 66                                                  | 6.38 (5.01-8.12)    |

**Notes:** LA: Latin America, NA: North America, EU: Europe, WP: Western Pacific, EM: Eastern Mediterranean, AF: Africa. (i) incident cases only (i+r): incident and recurrent cases, IP: in-patient, ICD9: 008.45, EIA: Enzyme Immunoassay, Tox: Toxin, &: and, /: orCyt: Cytotoxin, GDH: glutamate dehydrogenase, Cul: Culture, PCR: polymerase chain reaction, LAMP: loop-mediated isothermal amplification, Lab: Laboratory confirmation, Symp: symptoms confirmation, including at least one of the following diarrhoeal disease, endoscopic or histologic features.

**Supplementary Table 6. CDI incidence in selected high risk settings, long-term care facilities (LTCF), intensive care units (ICU) and internal medicine (Intern Med)**

| Author               | Country     | Setting  | Study Years | Parameters                  | Case ascertainment | Laboratory assay           | Cases | CDI incidence rates and 95% confidence intervals |                 |
|----------------------|-------------|----------|-------------|-----------------------------|--------------------|----------------------------|-------|--------------------------------------------------|-----------------|
|                      |             |          |             |                             |                    |                            |       | 10,000 pt-days                                   | 1,000 admission |
| Brakovich (2013)     | US          | LTCF     | 2006-09     | ≥ 3 days (pre-intervention) | Lab+symp           | No details                 | 170   | 46.86 (40.32-54.46)                              |                 |
| Campbell (2009)      | US          | LTCF (i) | 2006        | ≥ 2 days incident cases     | Lab                | EIA                        | 6900  | 2.31 (2.25-2.36)                                 |                 |
| Kim (2011)           | US          | LTCF     | 2004-10     | ≥ 4-30 days                 | ICD9+chart         | Lab positive charge,Tx     | 96    | 1.67 (1.37-2.04)                                 |                 |
| Laffan (2006)        | US          | LTCF     | 2001-03     | ≥ 3 days                    | Lab+symp           | EIA                        | 119   | 6.23 (5.21-7.46)                                 |                 |
| Hooker (2015) [A]    | USA         | LTCF     | 2012-13     | Onset in ward               | Lab                | NAAT                       | 35    | 11.77 (8.45-16.4)                                |                 |
| Hooker (2015) [B]    | USA         | LTCF     | 2012-13     | Onset in ward               | Lab                | NAAT                       | 11    | 12.99 (7.19-23.46)                               |                 |
| Kazakova (2006)      | USA         | LTCF     | 2002-03     | Onset in ward               | Lab+symp           | Tox A                      | 2     | 0.4 (0.1-1.6)                                    |                 |
| Zarowitz (2015)      | USA         | LTCF     | 2009-10     | Onset in ward               | ICD9+Tx            | No details                 | 2048  | 0.98 (0.94-1.02)                                 |                 |
| Eckert (2013)        | France      | LTCF     | 2009 (6m)   | ≥ 2 days                    | Lab+symp           | Various                    | 286   | 0.94 (0.84-1.06)                                 |                 |
| Kim (2011)           | US          | LTCF     | 2004-10     | ≥ 30 days                   | Lab+symp           | Lab positive charge,Tx     | 66    | 1.65 (1.30-2.10)                                 |                 |
| Mylotte (2013)       | US          | LTCF     | 2009-11     | ≥ 30 days                   | Lab+symp           | EIA                        | 12    | 0.56 (0.32-0.99)                                 |                 |
| McFarland (2007)     | US          | LTCF     | 2004        | All cases                   | Lab+symp           | EIA                        | 17    | 4.20 (2.61-6.76)                                 |                 |
| Pawar (2012)         | US          | LTCF (i) | 2010        | All cases incident cases    | Lab+symp           | EIA                        | 425   | 2.26 (2.06-2.49)                                 |                 |
| Laffan (2006)        | US          | LTCF     | 2001-03     | All cases                   | Lab+symp           | EIA                        | 186   | 9.74 (8.44-11.3)                                 |                 |
| Eckert (2013)        | France      | LTCF     | 2009 (6m)   | All cases                   | Lab+symp           | Various                    | 295   | 1.15 (1.03-1.29)                                 |                 |
| Silva (2013)         | Brazil      | ICU      | 2005-09     | All cases                   | Lab+symp           | EIA                        | 15    | 3.26 (1.96-5.40)                                 |                 |
| Souza Dias (2010)    | Brazil      | ICU      | 2002-03     | Onset in ward               | Lab+symp           | EIA Tox A&B, Cul           | 51    | 7.90 (6.00-10.39)                                |                 |
| Souza Dias (2010)    | Brazil      | ICU      | 2002-03     | All cases                   | Lab+symp           | Cul, PCR                   | 55    | 8.52 (6.54-11.10)                                |                 |
| Dodek (2013)         | Canada      | ICU      | 2006-11     | Onset in ward               | Lab+symp           | EIA Tox, Cyt, PCR          | 236   | 15.41 (13.56-17.51)                              |                 |
| Elligsen (2012)      | Canada      | ICU      | 2008-09     | Nosocomial                  | No details         | No details                 | 59    | 11.85 (9.18-15.3)                                |                 |
| Faires (2014)        | Canada      | ICU      | 2006-11     | Onset in ward               | Lab+symp           | EIA Tox A&B, GDH           | 11    | 2.68 (1.48-4.84)                                 |                 |
| Teltsch (2011)       | Canada      | ICU      | 2000-05     | Onset in ward               | Lab+symp           |                            | 135   | 29.3 (24.75-34.69)                               |                 |
| Wang (2014)          | China       | ICU      | 2012-13     | No details                  | Lab+symp           | PCR                        | 31    | 25.20 (17.72-35.83)                              |                 |
| Barbut (2007)        | France      | ICU      | 2000-04     | All cases                   | Lab+symp           | Cyt, Cul, EIA, PCR         | 25    | 10.00 (6.76-14.80)                               |                 |
| Khanfer (2013)       | France      | ICU      | 2007-11     | All cases                   | Lab+symp           | Cyt, EIA                   | 40    | 12.94 (9.49-17.64)                               |                 |
| Zahar (2012)         | France      | ICU      | 1999-09     | Onset in ward               | Lab+symp           | EIA                        | 47    | 36.00 (27.05-47.91)                              |                 |
| Buendgens (2014)     | Germany     | ICU      | 1999-10     | Onset in ward               | Lab+symp           | EIA and/or PCR Tox A/B     | 110   | 14.91 (12.38-17.97)                              |                 |
| Weitzel-K (2008)     | Germany     | ICU      | 2007        | Onset in ward               | Lab+symp           | Tox, Cul                   | 160   | 7.52 (6.44-8.78)                                 |                 |
| Weitzel-K (2008)     | Germany     | ICU      | 2007        | All cases                   | Lab+symp           | Tox, Cul                   | 193   | 9.07 (7.88-10.44)                                |                 |
| Czepiel (2015)       | Poland      | ICU      | 2008-14     | All cases                   | Lab+symp           | Antigen, ELISA Tox A/B     | 72    | 24.4 (19.37-30.74)                               |                 |
| Khan (2012)          | Qatar       | ICU‡     | 2006-09     | No details                  | Lab+symp           | EIA Tox A/B                | NR    | 0.09-0.3                                         |                 |
| Alvarez-Lerma (2014) | Spain       | ICU      | 2012        | Hosp                        | Lab+symp           | GDH, EI ATox A/B, Cyt, PCR | 31    | 2.06 (1.45-2.93)                                 |                 |
| Bouza (2015)         | Spain       | ICU      | 2003-1      | All cases                   | Lab+symp           | Tox Rapid Test             | 117   | 18.24 (15.22-21.86)                              |                 |
| Salva (2014)         | Spain       | ICU      | 2010-11     | All cases                   | Lab+symp           | EIA Tox A/B                | 7     | 3.10 (1.48-6.50)                                 |                 |
| Thibault (2013)      | Switzerland | ICU      |             | Onset in ward               | Lab+symp           | No details                 | 2     | 9.81 (2.45-39.24)                                |                 |
| Chung (2010)         | Taiwan      | ICU      | 2007-08     | No details                  | Lab+symp           | EIA Tox A/B                | 26    | 11.06 (7.35-16.64)                               |                 |
| Hsu (2006)           | Taiwan      | ICU      | 2003-04     | No details                  | Lab+symp           | EIA Tox A/B                | 6     | 10.12 (4.55-22.52)                               |                 |
| Lee (2012)           | Taiwan      | ICU      | 2009-10     | All new cases               | Lab+symp           | GDH+EIA Tox A/B            | 4     | 7.92 (2.97-21.1)                                 |                 |
| Ang (2008)           | UK-Eng      | ICU      | 2004-07     | >48 hours ICU admission     | Lab+symp           | Cyt A&B                    | 62    | 33.48 (26.10-42.94)                              |                 |
| Shears (2010)        | UK-Eng      | ICU      | 2006-07     | Onset in ward               | Lab+symp           | Cyt, EIA Tox A/B           | 11    | 24.00 (13.29-43.34)                              |                 |
| Wilson (2011) [a]    | UK-England  | ICU      | 2007        | Onset in ward               | Lab                | No details                 | 8     | 14.8 (7.4-29.6)                                  |                 |
| Wilson (2011) [b]    | UK-England  | ICU      | 2007        | Onset in ward               | Lab                | No details                 | 8     | 6.2 (3.1-12.4)                                   |                 |
| Reddy (2010)         | UK-Scotland | ICU      | 2003-07     | Hosp                        | Lab                | Tox EIA                    | NR    | 6.23                                             |                 |
| MoH Uruguay (2012)   | Uruguay     | ICU      | 2012        | No details                  | S-Surv, Lab        | No details                 | 40    | 5.12 (3.76-6.98)                                 |                 |
| Brown (2015)         | US          | ICU      | 2010-14     | All cases                   | Lab+symp           |                            | 62    | 9.52 (7.43-12.22)                                |                 |
| Lawrence (2007)      | US          | ICU      | 1997-99     | >24h bef/onset in ICU       | Lab+symp           | Cyt, Tox A/B               | 40    | 32 (23.47-43.63)                                 |                 |
| McFarland (2007)     | US          | ICU      | 2004        | No details                  | Lab+symp           | EIA                        | NR    | 50.3                                             |                 |
| Barletta(2014)       | US          | ICU      | 2001-08     | Hosp                        | ICD9               | No details                 | 239   | 6.62 (5.83-7.51)                                 |                 |
| Nagaraja (2015)      | US          | ICU      | 2010-11     | Onset in ward               | Lab+symp           | PCR Tox B gene             | 47    | 18.25 (13.71-24.29)                              |                 |

| Author                | Country   | Setting           | Study Years | Parameters                    | Case ascertainment | Laboratory assay      | Cases | CDI incidence rates and 95% confidence intervals |                 |
|-----------------------|-----------|-------------------|-------------|-------------------------------|--------------------|-----------------------|-------|--------------------------------------------------|-----------------|
|                       |           |                   |             |                               |                    |                       |       | 10,000 pt-days                                   | 1,000 admission |
| Passaretti (2013)     | US        | ICU               | 2007        | Onset in ward                 | Lab+symp           | No details            | 26    | 26.87 (18.29-39.47)                              |                 |
| Popovich (2009)       | US        | ICU               | 2004-05     | Onset in ward                 | Lab                | No details            | 6     | 8.9 (4-19.81)                                    |                 |
| Sabbah (2015)         | US        | ICU               | 2003-08     | Onset in ward                 | Lab                | No details            | 347   | 34.66 (31.2-38.51)                               |                 |
| Ahmetagic (2013)      | Bosnia    | Internal med      | 2009-12     | Onset in ward                 | Lab+symp           | ELISA Tox A/B         | 86    | 3.30 (2.63-4.14)                                 |                 |
| Faires (2014)         | Canada    | Internal Med      | 2006-11     | Ward acquired (>48 hours)     | Lab+symp           | EIA Tox A/B           | 27    | 2.16 (1.48-3.15)                                 |                 |
| Lee (2014)            | Canada    | Internal med      | 2012-13     | >3 days/IP (pre-intervention) | Lab only           | PCR                   | 40    | 24.1 (17.7-32.9)                                 |                 |
| Balihar (2014)        | Czech Rep | Internal med      | 2006-08     | Onset in ward                 | Lab+symp           | EIA                   | 45    | 3.01 (2.24-4.03)                                 |                 |
| Balihar (2014)        | Czech Rep | Internal med      | 2006-08     | All cases                     | Lab+symp           | EIA                   | 56    | 3.74 (2.88-4.86)                                 |                 |
| Weitzel-K (2008)      | Germany   | Internal med      | 2007        | Onset in ward                 | Lab+symp           | Tox, Cul              | 1112  | 7.99 (7.53-8.47)                                 |                 |
| Weitzel-K (2008)      | Germany   | Internal med      | 2007        | All cases                     | Lab+symp           | Tox, Cul              | 1687  | 12.12 (11.55-12.71)                              |                 |
| Kurti (2015)          | Hungary   | Dept. med         | 2010-13     | All cases                     | Lab                | Cyt, Cul              | 247   | 25.65 (22.64-29.06)                              |                 |
| Bishara (2013)        | Israel    | Internal Med      | 2011        | All cases                     | Lab+symp           | EIA Tox A/B           | 178   | 28.25 (24.4-32.72)                               |                 |
| Nseir (2013)          | Israel    | Internal med      | 2011        | Onset in ward                 | Lab+symp           | EIA Tox               | 197   | 28.76 (25.01-33.07)                              |                 |
| Mellace (2013)        | Italy     | Internal med      | 2008-09     | Onset in ward                 | Lab+symp           | EIA Tox, Cul, Cyt     | 146   | 23.3 (19.81-27.4)                                |                 |
| Sansone (2009)        | Italy     | Internal med      | 2007-08     | Onset in ward                 | Lab+symp           | EIA                   | 13    | 6.23 (3.62-10.73)                                |                 |
| Garcia (2007)         | Peru      | ICU, Internal med | 2005-06     | All cases                     | Lab+symp           | ELISA                 | 55    | 12.90 (9.90-16.80)                               |                 |
| Czepiel (2015)        | Poland    | Internal Med      | 2008-14     | All cases                     | Lab+symp           | ELISA Tox A/B         | 890   | 4.04 (3.78-4.31)                                 |                 |
| Khan (2012)           | Qatar     | Internal med      | 2006-09     | No details                    | Lab+symp           | EIA Tox A/B           | NR    | 0.5                                              |                 |
| Koh (2007)            | Singapore | Internal med      | 2002-03     | All cases                     | Lab+symp           | EIA Tox A/B, PCR, Cul | 13    | 3.25 (1.88-5.59)                                 |                 |
| Marco-Martínez (2015) | Spain     | Int Med           | 2005-10     | All cses                      | ICD9               |                       | 7247  | 2.16 (2.11-2.21)                                 |                 |
| Chung (2010)          | Taiwan    | Internal med      | 2007-08     | All cases                     | Lab+symp           | EIA Tox A/B           | 60    | 1.05 (0.82-1.35)                                 |                 |
| Shears (2010)         | UK-Eng    | Internal med      | 2006-07     | Onset in ward                 | Lab+symp           | Cyt, EIA Tox A/B      | 43    | 11.00 (8.16-14.83)                               |                 |
| Dubberke (2009)       | US        | General med       | 2006-11     | Onset in ward                 | Lab+symp           | EIA Tox A/B           | 148   | 16.00 (13.62-18.80)                              |                 |

**Notes:** LTCF: Long-term care facility, ICU: Intensive Care Unit, \*Mean: 31.2 CDI cases per 10,000 patients-days but information could not be confirmed by author. ICD9: code 008.45, S-Surv: Sentinel surveillance, Tx: Treatment, NR: Not reported. Pawar (2012) and Campbell also report rates for initial and recurrent episodes: 3.24 cases per 10,000 patient-days (95CI 2.99-3.51) and 3.74 (95CI 2.19-6.38), respectively. ‡medical, surgical, trauma/coronary care. (i) incident cases only (i+r): incident and recurrent cases, IP: in-patient, ICD9: 008.45, EIA: Enzyme Immunoassay, Tox: Toxin, &: and, /: or Cyt: Cytotoxin, GDH: glutamate dehydrogenase, Cul: Culture, PCR: polymerase chain reaction. NAAT: nucleic acid amplification test Lab: Laboratory confirmation, Symp: symptoms mentioned, including at least one of the following unformed or loose stool, diarrhoeal disease, endoscopic or histologic features, Tx: Treatment.

**Supplementary Table 7. CDI incidence, all outcomes (children)**

| Reference              | Country     | Study years          | Age (Y)    | Case definition              | Case ascertainment | Laboratory assay        | CDI cases | CDI Incidence rate (95% Confidence Interval) |                     |                     |
|------------------------|-------------|----------------------|------------|------------------------------|--------------------|-------------------------|-----------|----------------------------------------------|---------------------|---------------------|
|                        |             |                      |            |                              |                    |                         |           | 10,000 patient-days                          | 1,000 admission     | 100,000 population  |
| Ahmetagic (2013)       | Bosnia      | 2009-12              |            | HCF-CDI                      | Lab+symp           | ELISA ToxA&B            | 2         | 0.16 (0.02-1.14) <sup>‡</sup>                | 0.09 (0.01-0.64)    |                     |
| PHA (2014)             | Canada      | 2007-12              | Children   | HCF-CDI                      | Lab+symp           | PCR, PFGE               | 580       | 4.25 (3.92-4.61)                             | 2.27 (2.10-2.47)    |                     |
| Schwartz (2014)        | Canada      | 2008-12              | 1-17       | HCF-CDI                      | Lab                | Cyt, PFGE               | 222       | 8.30 (7.28-9.47)                             |                     |                     |
| Sathyendran (2014)     | N Zealand   | 2011-12              | <15        | All IP cases                 | Lab                | EIA+GDH/PCR             | 46        | 2.00 (1.50-2.67)                             |                     |                     |
| Duleba (2013)          | Poland      | 2010-12              | <18        | HCF-CDI (>48 hours/IP<4 wks) | Lab+symp           | PCR                     | 28        |                                              | 6.01 (4.15-8.71)    |                     |
| Jen (2012)             | UK-England  | 1997-10              | 2-19       | HCF-CDI                      | ICD10+≥72LOS       |                         | 1549      | 0.67 (0.64-0.7)                              | 0.15 (0.14-0.16)    |                     |
| Reddy (2010)           | UK-Scotland | 2003-07              | 0-20       | All IP                       | Lab                |                         | 94        | 4.5 (3.68-5.51)                              |                     |                     |
| Tschudin-S (2013)      | US          | 2003-12              | 1-21       | HCF-CDI (>48 hours/IP<4 wks) | Lab+symp           | GDH+CytA/B/PCR; PCR     | 144       |                                              | 2.50 (2.12-2.94)    |                     |
| Yin (2013)             | US          | 2002-10              | Children   | HAI                          | Lab                | No details              | 72        | 4.27 (3.39-5.38)                             |                     |                     |
| Nagaraja (2015)        | USA         | 2010-11              | Pediatrics | >72 hours                    | Lab                | PCR                     | 17        | 7.09 (4.41-11.41)                            |                     |                     |
| Benson (2007)          | US          | 2001-06 <sup>^</sup> | Children   | All cases                    | Lab+symp           | EIA Tox A/B             | 21        | 8.5 (5.56-13.07)                             |                     |                     |
| Tartof (2014)          | USA         | 2011-12              | 2-18       | All cases                    | Lab                | PCR                     | 94        | 18.52 (15.13-22.67)                          |                     |                     |
| Mitchell (2014)        | Australia   | 2007-10              | 2-19       | HO HCF-CDI (>48 hours)       | Lab+symp           | ELISA ToxA&B+PCR        | 9         |                                              | 1.80 (0.94-3.46)    |                     |
| Sathyendran (2014)     | N Zealand   | 2011-12              | <15        | HO                           | Lab                | EIA+GDH/PCR             | 29        | 1.26 (0.88-1.81)                             |                     |                     |
| Campbell (2009)        | US          | 2006                 | Pediatric  | HO HCF-CDI                   | Lab+symp           | EIA, Cyt, GDH, a/o Cul  | NR        | 2.6                                          |                     |                     |
| Tschudin-S (2013)      | US          | 2003-12              | 1-21       | HO HCF-CDI (>48 hours)       | Lab+symp           | GDH+CytA/B/PCR; PCR     | 103       |                                              | 1.78 (1.47-2.16)    |                     |
| Duleba (2013)          | Poland      | 2010-12              | <18        | CA-CDI (no IP 12wks)         | Lab+symp           | PCR                     | 33        |                                              | 7.09 (5.04-9.97)    |                     |
| Soes (2014)            | Denmark     | 2009-11              | 2-19       | CA-CDI                       | Lab+symp GP        | Cul                     | 6         |                                              | 5.42 (2.44-12.07)   |                     |
| Jen (2012)             | UK-England  | 1997-10              | 2-19       | CA-CDI                       | ICD10 no IP<90d    |                         | 337       |                                              | 0.03 (0.027-0.03)   |                     |
| CDC (2008)             | US          | 2006                 | 0-14       | CA-CDI                       | Lab+symp           | EIA Tox                 | 18        |                                              | 2.71 (1.71-4.30)    |                     |
| Khanna (2013)          | US          | 1991-09              | <18        | CA-CDI                       | ICD-9+Lab+symp     | EIA, PCR + chart review | 69        |                                              | 10.30 (8.14-13.04)  |                     |
| Lessa (2015)           | US          | 2011                 | 1-17       | CA-CDI                       | Lab+symp           | Tox,PCR                 | 12,500    |                                              | 17.90 (14.10-21.40) |                     |
| Tschudin-S (2013)      | US          | 2003-12              | 1-21       | CA-CDI                       | Lab+symp           | GDH+CytA/B/PCR; PCR     | 38        | 0.66 (0.48-0.90)                             |                     |                     |
| Lessa (2014)           | USA         | 2010                 | 1-17       | CA-CDI                       | No IP <12 wks      | Tox, PCR                |           |                                              | 13.6 (12-15.2)      |                     |
| Mitchell (2012)        | Australia   | 2010-11              | 2-19       | All cases IP                 | Lab+symp           | See above               | 15        |                                              | 5.66 (3.41-9.39)    |                     |
| Kotila (2011)          | Finland     | 2008                 | 1-14       | All cases IP                 | Lab+symp           | Cul, Tox                | 137       |                                              | 16.40 (13.87-19.39) |                     |
| Vesteinsdottir (2012)  | Iceland     | 2010-11              | 0-17       | All cases IP                 | Lab                | ELISA Tox A&B           | 18        |                                              | 22.00 (13.86-34.92) |                     |
| Duleba (2013)          | Poland      | 2010-12              | <18        | All cases IP                 | Lab+symp           | PCR                     | 64        |                                              | 13.75 (10.76-17.56) |                     |
| Rodriguez-Pardo (2013) | Spain       | 2009                 | <15        | All cases IP                 | Lab+symp           | Tox A&B, Cul            |           |                                              | 8.1                 |                     |
| Santiago (2015)        | Spain       | 2010-11              | <15        | All cases IP                 | Lab+symp           | Tox                     | 19        |                                              | 3 (1.91-4.7)        |                     |
| PHE (2014)             | UK          | 2013-15              | 2-14       | All cases IP                 | Lab+symp           | Tox, PCR                | 278       |                                              | 3.44 (3.06-3.87)    |                     |
| Lessa (2014)           | US          | 2010                 | 1-17       | All cases IP                 | Lab+symp           | PCR                     |           |                                              | 19.9 (17.2-22.6)    |                     |
| Tartof (2014)          | US          | 2011-12              | 2-18       | All cases IP                 | Lab                | PCR                     | 94        | 18.5 (15.13-22.67)                           | 5.45 (4.35-6.82)    |                     |
| Tschudin-S (2013)      | US          | 2003-12              | 1-21       | All cases IP                 | Lab+symp           | GDH+CytA/B/PCR; PCR     |           |                                              | 3.50 (3.05-4.02)    |                     |
| Argamany (2015)        | US          | 2001-10              | <18        | All cases                    | ICD-9              |                         | 825558    |                                              | 1.2 (1.2-1.2)       |                     |
| Chen (2012)            | US          | 2001-08              | ≥1*        | Any position                 | ICD-9+Lab+symp     | No details              | 231       |                                              | 4.30 (3.78-4.89)    |                     |
| Khanna (2013)          | US          | 1991-09              | 0-18       | All cases                    | ICD-9+Lab+symp     | EIA Tox + PCR           | 92        |                                              | 13.73 (11.20-16.85) |                     |
| Kim (2008)             | US          | 2001-06              | <18        | All cases                    | ICD-9+Lab+symp     | EIA Tox                 | 34141     |                                              | 3.30 (3.21-3.39)    |                     |
| Lee (2012)             | US          | 2000-08              | <18        | First 2 diagnoses            | ICD-9              | No details              | 3665      |                                              | 0.57 (0.56-0.57)    |                     |
| Lucado (2012)          | US          | 1993-09              | <18        | Any position                 | ICD-9              | No details              | 8418      |                                              | 1.3 (1.27-1.33)     | 11.29 (11.05-11.54) |
| McDonald (2006)        | US          | 1996-03              | <15        | Any position                 | ICD-9              | No details              | NR        |                                              | 9 (5-9)             |                     |
| Rhee (2014)            | US          | 2010-12              | 1-17       | All cases                    | Lab+symp           | EIA Tox + GDH           | 197       |                                              | 41.74 (36.30-47.99) |                     |
| Sammons (2013)         | US          | 2006-11              | 1-18       | All cases                    | ICD-9+Lab test     | No details              | 5107      |                                              | 7.31 (7.11-7.52)    |                     |
| Shaklee (2011)         | US          | 2007 (6m)            | <18        | Any position                 | ICD-9              | No details              | 119       |                                              | 4.37 (3.65-5.23)    |                     |
| Shaklee (2011)         | US          | 2007 (6m)            | <18        | All cases                    | ICD-9+Lab test     | Tox, Cul                | 109       |                                              | 4.00 (3.32-4.83)    |                     |
| Smith (2011)           | US          | 2001-10              | 0-14       | Any position                 | ICD-9              | No details              | 690       |                                              | 7.13 (6.62-7.68)    |                     |
| VerLee (2012)          | US          | 2002-08              | <20        | Any position                 | ICD-9              | No details              | 170       |                                              | 1.12 (0.75-1.67)    |                     |
| Zilberberg (2010)      | US          | 1997-06              | 0-17       | Any position                 | ICD-9              | No details              | 24037     |                                              | 0.93 (0.92-0.94)    |                     |
| Zilberberg (2010)      | US          | 2006                 | 0-17       | Any position                 | ICD-9              | No details              | 98        |                                              | 1.45 (1.19-1.76)    |                     |

**Notes:** <sup>^</sup>2 years data (2001: 5 cases, IR 10.24; 2006: 16, IR: 6.8 cases per 10,000 patient-days); <sup>‡</sup> Weighted mean, \* <1 included if treated with metronidazole. Surv: Surveillance, HAI: Healthcare associated infection. AL: America, Latin, AN: America, North, EU: Europe, WP: Western Pacific, EM: Eastern Mediterranean, AF: Africa. (i) incident cases only (i+r): incident and recurrent cases, IP: in-patient, ICD9: 008.45, EIA: Enzyme Immunoassay, Tox: Toxin, &: and, /: or Cyt: Cytotoxin, GDH: glutamate dehydrogenase, Cul: Culture, PCR: polymerase chain reaction. Lab: Laboratory confirmation, Symp: symptoms confirmation, including at least one of the following diarrhoeal disease, endoscopic or histologic features



**Supplementary Table 8. CDI incidence, all outcomes (elderly)**

| Author                 | Country      | Study years  | Age (Years) | CDI category | Case ascertainment                  | Laboratory assay     | CDI Cases | CDI incidence rates and 95% confidence interval |                     |                        |
|------------------------|--------------|--------------|-------------|--------------|-------------------------------------|----------------------|-----------|-------------------------------------------------|---------------------|------------------------|
|                        |              |              |             |              |                                     |                      |           | 10,000 patient-days                             | 1,000 admission     | 100,000 population     |
| Koh (2007)             | Singapore    | 2002-03 (5m) | ≥60         | HCF-CDI      | Lab+symp                            | EIA Tox A/B, Cul     | 53        |                                                 | 4.73 (3.61-6.19)    |                        |
| PHE                    | UK England   | 2004-07      | ≥65         | All IP cases | Lab                                 | No details           | 202492    | 21.73 (21.64-21.83)                             |                     |                        |
| HPS                    | UK Scotland  | 2006-14      | ≥65         | All IP cases | Lab                                 | No details           | 24841     | 7.67 (7.57-7.77)                                |                     |                        |
| Jen (2012)             | UK-England   | 1997-10      | ≥60         | HCF-CDI      | ICD9 + >72LOS                       | No details           | 173843    | 5 (4.98-5.03)                                   | 5.75 (5.72-5.78)    |                        |
| HSC                    | UK-N.Ireland | 2011         | ≥65         | All IP cases | Lab                                 | No details           | 1953      | 3.75 (3.59-3.92)                                |                     |                        |
| Murphy (2012)          | US           | 2000-2007    | >75         | HCF-CDI      | ICD9 + Post Discharge history       | No details           | 3379      |                                                 | 4.22 (4.08-4.37)    |                        |
| Tartof (2014)          | US           | 2011-12      | >65         | All IP cases | Lab                                 | PCR                  | 3214      | 46.8 (45.2-48.5)                                | 27.67 (26.66-28.72) |                        |
| Zilberberg (2011)      | US           | 2007-08      | >65         | HCF-CDI      | Lab (LabID database)                | EIA Tox              | 4328      | 11.76 (11.4-12.1)                               | 5.97 (5.79-6.15)    |                        |
| Mitchell (2014)        | Australia    | 2007-10      | ≥65         | HO HCF-CDI   | Lab+symp                            | EIA ToxA&B, PCR, Cul | 104       |                                                 | 3.93 (3.24-4.76)    |                        |
| Brown (2015)           | US           | 2010-14      | >60         | HO HCF-CDI   | Lab+symp                            | PCR                  | 196       | 6.39 (5.56-7.35)                                |                     |                        |
| Murphy (2012)          | US           | 2000-2007    | >75         | HO HCF-CDI   | ICD9 (First position+no PD)         | No details           | 1352      |                                                 | 1.69 (1.60-1.78)    |                        |
| Zilberberg (2011)      | US           | 2007-08      | >65         | HO HCF-CDI   | Lab                                 | EIA Tox              | 3114      | 8.46 (8.17-8.77)                                | 4.29 (4.14-4.45)    |                        |
| Mitchell (2012)        | Australia    | 2010-11      | >60         | All cases    | Lab+symp                            | EIA, PCR, Cul        | 161       |                                                 |                     | 142.76 (122.33-166.6)  |
| Kotila (2012)          | Finland      | 2008         | ≥65         | All cases    | Lab                                 | Cul, Tox             | 4217      |                                                 |                     | 481.5 (442.8-520.1)    |
| Lyytikäinen -82009)    | Finland      | 1996-04      | >64         | All cases    | ICD10                               |                      | 582       |                                                 |                     | 108 (99.54-117.18)     |
| Vesteinsdottir (2012)  | Iceland      | 2010-11      | ≥65         | All cases    | Lab                                 | ELISA Tox A&B        | 91        |                                                 |                     | 166 (135-204)          |
| Rodriguez-Pardo (2013) | Spain        | 2009         | >65         | All cases    | Lab+symp                            | Tox A&B, Cul         | NR        |                                                 |                     | 67                     |
| PHE                    | UK-England   | 2013-15      | ≥65         | All cases    |                                     |                      | 21780     |                                                 |                     | 246.69 (243.52-249.9)  |
| Kuntz (2012)           | US           | 2007         | >60         | Any position | Lab+ ICD                            | EIA Tox              | 485       |                                                 |                     | 318.32 (291.22-347.95) |
| Lessa (2014)           | US           | 2010         | ≥65         | All cases    | Lab+symp                            | Tox, PCR             |           |                                                 |                     | 631.8 (613.7-659.8)    |
| Lessa (2015)           | US           | 2011         | ≥65         | All cases    | Lab+symp                            | Tox, PCR             | 259800    |                                                 |                     | 627.7 (566.8-687.3)    |
| Lucado (2012)          | US           | 2009         | ≥65         | Any position | ICD9                                | No details           | 219159    |                                                 |                     | 484.85 (482.83-486.89) |
| Mah (2011)             | US           | 2007-2008    | >59         | All cases    | Lab+symp                            | EIA Tox              | 144       |                                                 | 7.64 (6.49-9.00)    |                        |
| McDonald (2006)        | US           | 1996-03      | ≥65         | Any position | ICD9                                | No details           | NR        |                                                 |                     | 228 (200-256)          |
| Murphy (2012)          | US           | 2000-2007    | >75         | All cases    | ICD9                                | No details           | 7807      |                                                 | 9.76 (9.55-9.98)    |                        |
| Rogers (2014)          | US           | 1991-07      | >50         | Any position | ICD9                                | No details           | 404       |                                                 |                     | 220.6 (193.3-248.8)    |
| Smith (2011)           | US           | 1999-08      | ≥65         | Any position | ICD9                                | No details           | 11916     |                                                 |                     | 233 (229-238)          |
| VerLee (2012)          | US           | 2002-08      | ≥65         | Any position | ICD9                                | No details           | 68686     |                                                 | 68.5 (64.02-73.2)   | 7.35 (7.29-7.41)       |
| Zilberberg (2008)      | US           | 2000-05      | ≥65         | Any position | ICD9                                | No details           | 617130    |                                                 |                     | 386.62 (384.7-388.55)  |
| Zilberberg (2011)      | US           | 2007-08      | >65         | All cases    | Lab+symp                            | EIA Tox              | 5667      |                                                 | 7.81 (7.61-8.01)    |                        |
| Argamany (2015)        | USA          | 2001-10      | ≥65         | Any position | ICD-9                               |                      | 1538933   |                                                 | 11.6 (11.58-11.62)  |                        |
| Chopra (2015)          | USA          | 2012         | ≥60         | Any position | ICD-9                               |                      | 364       |                                                 | 16.37 (14.77-18.14) |                        |
| Collins (2014)         | US           | 2009-2011    | ≥65         | CA-CDI       | ICD9 First code+no IP>90 days)      | No details           | 1566      |                                                 | 1.81 (1.72-1.90)    |                        |
| Murphy (2012)          | US           | 2000-2007    | >74         | CA-CDI       | ICD9 POA + (no IP>12 wks)           | No details           | 4090      |                                                 | 5.11 (4.96-5.27)    |                        |
| Zilberberg (2011)      | US           | 2007-08      | >65         | CA-CDI       | Lab+symp (no IP>12 wks)             | EIA Tox              | 1349      |                                                 | 1.86 (1.76-1.96)    |                        |
| Jen (2012)             | UK-England   | 1997-10      | ≥60         | CA-CDI       | ICD9 + no IP <90days                |                      | 17118     |                                                 | 0.57 (0.56-0.58)    |                        |
| Dial (2008)            | Canada       | 1996-04      | ≥65         | CA-CDI       | ICD9 + IP history                   | No details           | 836       |                                                 |                     | 35 (32.71-37.45)       |
| Soes (2014)            | Denmark      | 2009-11      | ≥60         | CA-CDI       | Lab+symp (no IP>12 wks, <48h IP)    | Cul                  | 51        |                                                 |                     | 46.10 (35.03-60.66)    |
| Marwick (2013)         | UK           | 2008-09      | ≥65         | CA-CDI       | Lab+symp (i+r)                      | EIA Tox A&B          | 156       |                                                 |                     | 203.99 (174.36-238.65) |
| Taori (2014)           | UK-Scotland  | 2010-11      | ≥65         | CA-CDI       | Lab no IP history <12 weeks         | EIA ToxA/B, GDH      | 26        |                                                 |                     | 25.8 (17.56-37.9)      |
| Kutty (2010)           | US           | 2005         | ≥65         | CA-CDI       | No IP>8 wks, OP/<3-4 days IP        | EIA Tox A&B          |           |                                                 |                     | 146.4                  |
| Lessa (2015)           | US           | 2011         | ≥65         | CA-CDI       | Lab+symp (no IP>12 wks, <24h IP/OP) | Tox, PCR             | 60500     |                                                 |                     | 146.2 (124.0-167.2)    |
| Lessa (2014)           | USA          | 2010         | ≥65         | CA-CDI       | Lab+symp (no IP>12 wks, <24h IP/OP) |                      |           |                                                 |                     | 114.4 (104.1-124.7)    |

Notes: EIP: Emerging infections Program (Centers for Disease Control), HCUP: Healthcare Cost and Utilization Project, ICD10: A047, ICD9: 008.45, PD: Post-discharge, IP: In-patient, NR: not reported, \*Daneman by decades (61-70, 71-80, 81-90), Surv: Surveillance, (i) incident cases only (i+r): incident and recurrent cases, IP: in-patient, ICD9: 008.45, EIA: Enzyme Immunoassay, Tox: Toxin, &: and, /: orCyt: Cytotoxin, GDH: glutamate dehydrogenase, Cul: Culture, PCR: polymerase chain reaction. Lab: Laboratory confirmation, Symp: symptoms confirmation, including at least one of the following diarrhoeal disease, endoscopic or histologic features. POA: Present on admission

**Supplementary Document 9. CDI density incidence (per 10,000 patient-days) from multicentre European studies**

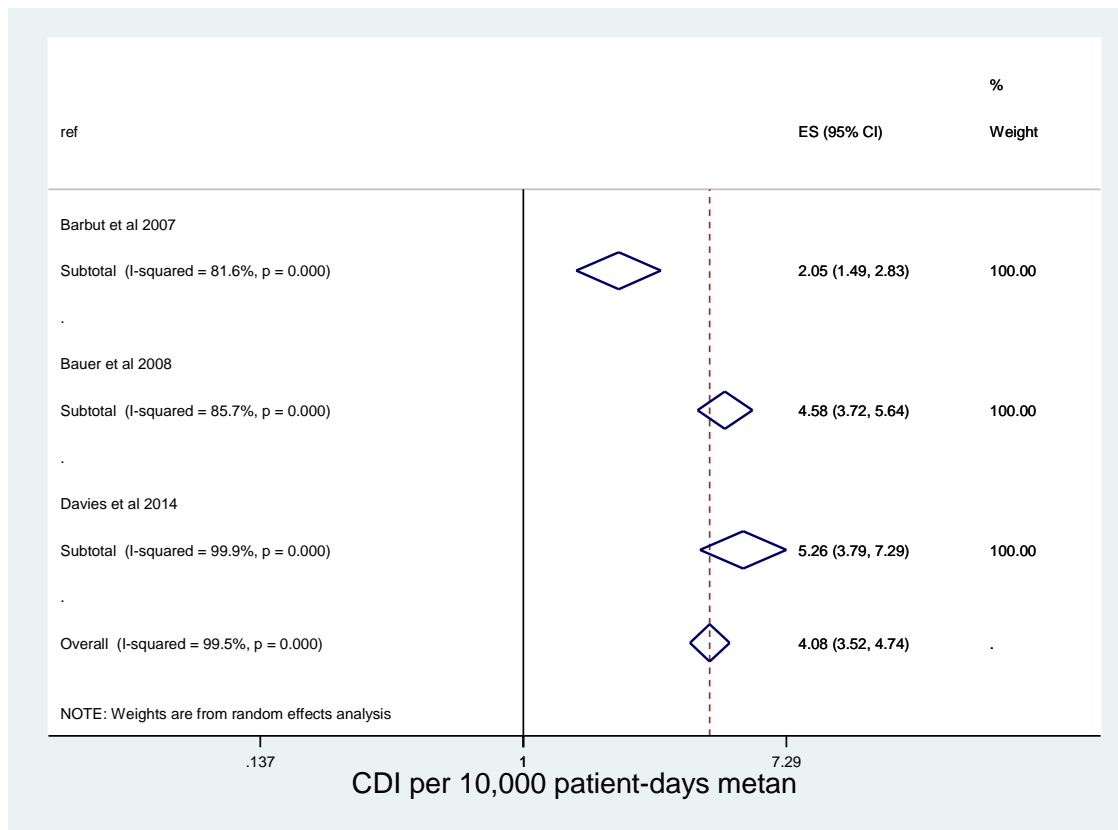

Supplement: jogh-09-010407-s001.pdf [file jogh-09-010407-s001.pdf]
